# Supplementary material for: Collaborative caching discovery management in mobile ad hoc networks environments
Source: PeerJ Comput Sci. 2023 Apr 17;9:e1320. doi: 10.7717/peerj-cs.1320 (PMC10280438; doi:10.7717/peerj-cs.1320)
Supplement: Supplemental Information 4 [file peerj-cs-09-1320-s004.xls]

## Sheet: mo
Time	ID	Req	Hop	Sent	Delay	AvgDelay	Hit	LocalH
150.18	6	392	8	150	0.179621	0.179621	0
150.304	3	160	14	150.232	0.071524	0.125572	1
150.376	2	69	14	150.133	0.243516	0.164887	0
150.407	4	1	27	150.228	0.178486	0.168287	0
151.304	20	15	9	151.123	0.18094	0.170817	0
151.373	14	17	29	151.172	0.201198	0.175881	0
151.378	15	903	11	151.167	0.210879	0.180881	0
151.573	11	79	26	151.257	0.316094	0.197782	0
151.648	18	558	26	151.521	0.126858	0.189902	0
151.73	16	8	29	151.528	0.202391	0.191151	0
151.747	19	750	28	151.589	0.157387	0.188081	0
152.041	21	13	6	152.033	0.007513	0.173034	1
152.432	26	219	12	152.285	0.147031	0.171034	0
152.529	24	76	27	152.259	0.269975	0.178101	0
152.608	30	23	20	152.4	0.208474	0.180126	0
152.628	28	783	26	152.49	0.138214	0.177506	0
152.669	23	350	25	152.371	0.298389	0.184617	0
153.447	32	59	12	153.297	0.149342	0.182657	0
153.449	40	3	21	153.131	0.318042	0.189783	0
153.497	34	6	13	153.352	0.144638	0.187525	0
153.584	31	9	26	153.433	0.150834	0.185778	0
154.041	43	1	2	154.03	0.011458	0.177855	1
154.395	44	5	24	154.17	0.225659	0.179933	0
154.444	46	95	28	154.286	0.158817	0.179053	0
154.651	42	5	28	154.381	0.269735	0.18268	0
154.679	49	12	25	154.489	0.190542	0.182983	0
154.771	47	264	29	154.339	0.431189	0.192176	0
155.066	55	5	7	155.062	0.00411	0.185459	1
155.463	57	429	26	155.302	0.160989	0.184615	0
155.466	60	178	27	155.199	0.267391	0.187374	0
155.552	54	51	30	155.326	0.226227	0.188628	0
155.588	51	16	15	155.488	0.100485	0.185873	0
155.63	56	37	26	155.428	0.202649	0.186382	0
156.177	64	69	9	156.074	0.102814	0.183924	1
156.296	63	5	6	156.292	0.003884	0.17878	1
156.304	67	17	9	156.097	0.206887	0.179561	1
156.308	70	5	11	156.173	0.134942	0.178355	1
156.427	68	1	19	156.222	0.204699	0.179048	1
156.447	69	1	21	156.435	0.012198	0.17477	1
156.463	66	14	24	156.329	0.134019	0.173751	0
156.53	62	2	28	156.395	0.135187	0.17281	0
156.664	61	245	29	156.549	0.115583	0.171448	0
157.059	75	5	7	157.021	0.038169	0.168348	1
157.178	76	12	10	157.163	0.015724	0.16488	1
157.419	72	17	14	157.407	0.011289	0.161466	1
157.441	71	19	23	157.328	0.112187	0.160395	0
157.483	80	13	12	157.466	0.016531	0.157334	1
157.498	77	8	20	157.241	0.256907	0.159409	1
157.559	78	35	24	157.287	0.272214	0.161711	0
157.581	74	395	25	157.358	0.223274	0.162942	0
157.633	73	10	29	157.405	0.227861	0.164215	0
158.036	83	17	3	158.028	0.007912	0.161209	1
158.049	89	17	6	158.032	0.017002	0.158488	1
158.305	86	24	21	158.102	0.203197	0.159316	0
158.33	88	99	23	158.215	0.11464	0.158504	0
158.355	87	13	12	158.348	0.007792	0.155813	1
158.381	84	659	17	158.242	0.138542	0.15551	0
158.52	90	53	29	158.3	0.220681	0.156633	0
159.273	99	23	7	159.263	0.010669	0.154159	1
159.365	91	343	22	159.238	0.127155	0.153709	0
159.371	100	1	19	159.359	0.012138	0.151388	1
159.394	96	9	12	159.39	0.004146	0.149014	1
159.41	95	67	25	159.298	0.112433	0.148433	0
159.458	97	34	17	159.299	0.158986	0.148598	0
159.533	93	22	28	159.385	0.148289	0.148593	0
160	4	1	0	160	0	0.146342	1
160.012	1	3	2	160.008	0.004046	0.144218	1
160.066	3	12	6	160.058	0.008112	0.142216	1
160.225	6	12	9	160	0.224925	0.143415	0
160.36	10	151	21	160.128	0.232138	0.144682	0
160.364	9	11	27	160.237	0.126563	0.144427	0
160.388	2	7	27	160.27	0.118228	0.144063	0
160.413	7	40	23	160.18	0.232633	0.145277	0
160.44	5	68	27	160.228	0.212948	0.146191	0
161.02	12	1	2	161.009	0.010526	0.144382	1
161.069	15	12	2	161.061	0.007852	0.142586	1
161.178	18	13	11	161.121	0.056692	0.14147	1
161.2	19	14	4	161.186	0.013825	0.139834	1
161.317	17	15	15	161.271	0.046223	0.138649	1
161.58	14	56	29	161.45	0.129834	0.138539	0
161.602	20	126	25	161.408	0.19348	0.139217	0
161.661	11	21	29	161.534	0.126519	0.139062	0
162.181	24	12	3	162.166	0.014538	0.137562	1
162.236	27	17	12	162.204	0.031526	0.136299	1
162.251	30	109	19	162.101	0.149681	0.136457	0
162.272	29	8	20	162.208	0.063533	0.135609	1
162.276	28	6	10	162.255	0.021056	0.134292	1
162.346	23	19	23	162.32	0.025893	0.13306	1
162.375	21	21	8	162.363	0.011979	0.1317	1
163.127	31	13	4	163.119	0.008052	0.130326	1
163.261	40	95	14	163.19	0.070914	0.129673	1
163.319	37	5	11	163.29	0.029046	0.128579	1
163.335	32	17	10	163.326	0.009752	0.127302	1
163.365	38	116	26	163.01	0.35419	0.129715	0
163.494	34	42	25	163.331	0.162534	0.130061	0
163.543	38	19	21	163.535	0.008032	0.12879	1
163.632	39	321	29	163.457	0.174836	0.129264	0
163.756	36	260	30	163.578	0.177958	0.129761	0
163.831	33	751	31	163.709	0.12157	0.129679	0
164.028	49	12	2	164.028	0	0.128382	1
164.03	42	5	2	164.03	0	0.127111	1
164.038	48	13	2	164.032	0.005677	0.12592	1
164.042	43	5	3	164.014	0.027589	0.124965	1
164.159	45	3	6	164.107	0.05227	0.124266	1
164.163	41	15	9	164.129	0.034308	0.12341	1
164.22	47	23	19	164.196	0.02379	0.12247	1
164.383	50	253	31	164.248	0.13513	0.122588	0
165.023	52	13	3	165.012	0.010869	0.121554	1
165.051	57	5	3	165.039	0.012425	0.120553	1
165.072	54	2	5	165.061	0.010927	0.119556	1
165.162	55	28	9	165.036	0.126447	0.119618	0
165.315	60	17	10	165.261	0.054336	0.119035	1
165.436	51	39	22	165.201	0.234133	0.120054	0
165.472	56	113	27	165.308	0.163606	0.120436	0
165.52	58	608	32	165.296	0.223655	0.121333	0
165.535	53	39	28	165.378	0.157037	0.121641	0
166.009	62	1	2	166.004	0.00536	0.120647	1
166.15	66	13	3	166.038	0.112654	0.12058	1
166.201	64	15	8	166.131	0.069911	0.120154	1
166.246	68	858	9	166.065	0.180626	0.120658	0
166.337	70	5	10	166.235	0.102756	0.12051	1
166.449	63	745	25	166.224	0.225087	0.121367	0
166.471	67	81	27	166.286	0.185254	0.121886	0
166.474	65	333	25	166.248	0.226194	0.122728	0
167.077	75	5	8	167.031	0.046262	0.122116	1
167.12	77	7	5	167.116	0.003665	0.121176	1
167.135	78	67	5	167.087	0.048298	0.120602	1
167.155	79	13	9	167.131	0.023632	0.119844	1
167.264	73	11	16	167.239	0.025172	0.11911	1
167.352	72	32	28	167.223	0.128798	0.119185	0
167.445	74	46	25	167.309	0.135685	0.119311	0
167.485	80	26	21	167.388	0.096331	0.119137	0
168.019	90	53	2	168.019	0	0.118241	1
168.135	88	9	6	168.131	0.004245	0.11739	1
168.171	83	14	8	168.106	0.064813	0.117001	1
168.429	87	966	23	168.203	0.22612	0.117803	0
168.435	89	22	24	168.412	0.022768	0.11711	1
168.489	84	425	29	168.278	0.210365	0.117785	0
168.557	86	4	29	168.42	0.137021	0.117924	0
169.099	96	26	10	169.091	0.007576	0.117136	1
169.262	94	22	9	169.242	0.020321	0.116449	1
169.308	93	16	13	169.173	0.134676	0.116577	1
169.422	99	24	20	169.368	0.054467	0.116143	1
169.425	98	239	20	169.275	0.150734	0.116383	0
169.544	95	28	20	169.537	0.007103	0.115629	1
169.609	100	255	28	169.484	0.124873	0.115693	0
170.167	6	444	8	170	0.167089	0.116042	0
170.21	4	10	11	170.202	0.007972	0.115312	1
170.412	9	91	16	170.292	0.119586	0.115341	0
170.439	5	63	27	170.174	0.265089	0.116339	0
170.489	7	1	16	170.469	0.019232	0.115696	1
170.493	8	564	29	170.278	0.214299	0.116345	0
170.508	2	63	25	170.376	0.132364	0.11645	0
171.04	12	2	4	171.02	0.019952	0.115823	1
171.458	17	103	28	171.259	0.199433	0.116362	0
171.604	13	309	24	171.363	0.240427	0.117158	0
171.643	16	763	30	171.392	0.250491	0.118007	0
171.669	14	292	25	171.225	0.444289	0.120072	0
171.714	11	216	30	171.517	0.197395	0.120558	0
171.733	19	43	28	171.565	0.16738	0.120851	0
172.078	24	53	3	172.058	0.019627	0.120222	1
172.309	28	395	5	172.233	0.076504	0.119952	1
172.339	22	12	4	172.278	0.060969	0.11959	1
172.431	27	29	21	172.252	0.179879	0.119958	0
172.443	30	61	24	172.295	0.148042	0.120128	0
172.474	26	34	17	172.466	0.007932	0.119452	1
172.498	21	419	29	172.297	0.200429	0.119937	0
172.63	25	204	29	172.387	0.243412	0.120672	0
173.106	34	5	7	173.102	0.003925	0.119981	1
173.399	38	350	12	173.376	0.023238	0.119412	1
173.507	39	268	21	173.349	0.158177	0.119639	0
173.568	40	30	25	173.267	0.30135	0.120696	0
173.587	37	47	26	173.35	0.237151	0.121369	0
173.611	32	97	29	173.413	0.197882	0.121808	0
173.628	36	753	29	173.464	0.163916	0.122049	0
174.172	41	15	9	174.152	0.019863	0.121468	1
174.268	49	15	9	174.256	0.012077	0.12085	1
174.286	45	1	16	174.243	0.04307	0.120413	1
174.343	50	3	20	174.303	0.040886	0.119969	1
174.418	42	52	22	174.295	0.12327	0.119987	0
174.569	47	232	31	174.377	0.192105	0.120386	0
175.009	53	12	2	175.003	0.005386	0.119754	1
175.026	56	32	4	175.021	0.005006	0.119127	1
175.103	51	5	7	175.096	0.007771	0.118522	1
175.194	52	14	5	175.186	0.00809	0.117925	1
175.207	59	4	11	175.163	0.043852	0.117527	1
175.237	58	3	17	175.182	0.055269	0.117194	1
175.276	55	143	22	175.119	0.156808	0.117404	0
175.357	54	11	26	175.304	0.05345	0.117066	1
175.524	57	182	31	175.377	0.147004	0.117224	0
176.101	67	42	6	176.082	0.018953	0.116709	1
176.134	65	120	7	176.011	0.123044	0.116742	0
176.172	70	5	7	176.165	0.007772	0.116177	1
176.28	62	23	19	176.241	0.038975	0.11578	1
176.326	61	19	17	176.303	0.02292	0.115303	1
176.371	69	1	19	176.36	0.011579	0.114774	1
176.417	68	94	22	176.233	0.184253	0.115127	0
176.576	63	60	27	176.438	0.137728	0.115241	0
176.683	66	162	31	176.518	0.165879	0.115495	0
177.019	76	1	2	177.015	0.004245	0.114939	1
177.084	71	12	10	177.055	0.02838	0.114509	1
177.114	80	17	3	177.103	0.011034	0.113996	1
177.262	72	14	13	177.251	0.01069	0.113487	1
177.347	73	117	16	177.194	0.15268	0.113679	0
177.38	79	242	25	177.232	0.148952	0.113852	0
177.416	75	193	27	177.302	0.113855	0.113852	0
178	86	4	0	0	0.00025	0.113852	1	1
178.031	84	12	4	178.027	0.003946	0.113321	1
178.17	81	1	19	178.158	0.011838	0.112833	1
178.357	89	21	13	178.349	0.008112	0.112332	1
178.507	87	943	27	178.305	0.201932	0.112758	0
178.546	90	133	31	178.371	0.174662	0.113052	0
179.053	99	11	6	179.049	0.003804	0.112536	1
179.075	96	7	5	179.056	0.019288	0.112099	1
179.165	93	39	12	179.114	0.051103	0.111814	1
179.177	91	12	11	179.096	0.081209	0.111671	1
179.191	97	12	12	179.177	0.014796	0.111223	1
179.27	92	14	9	179.262	0.008031	0.110747	1
179.286	100	6	14	179.23	0.056204	0.110497	1
179.296	95	1	21	179.247	0.04977	0.11022	1
180	4	1	0	180	0	0.109719	1
180.264	6	19	8	180	0.264039	0.110417	0
180.332	8	7	10	180.305	0.026689	0.11004	1
180.369	9	76	7	180.34	0.029518	0.109679	1
180.389	3	66	27	180.256	0.132648	0.109781	0
180.489	1	2	21	180.469	0.02023	0.109383	1
180.527	5	23	11	180.228	0.299295	0.110224	1
180.532	2	87	24	180.416	0.116216	0.11025	0
180.552	10	1	23	180.529	0.022988	0.109867	1
180.607	7	31	25	180.499	0.107769	0.109858	0
181.091	15	11	5	181.081	0.009554	0.109422	1
181.096	20	6	5	181.072	0.024788	0.109056	1
181.157	14	41	11	181.04	0.116295	0.109087	0
181.299	18	2	21	181.287	0.011617	0.108669	1
181.3	11	15	6	181.249	0.050928	0.108422	1
181.461	16	999	29	181.315	0.146024	0.108582	0
181.513	17	240	29	181.382	0.131006	0.108677	0
181.53	19	896	28	181.41	0.120527	0.108727	0
182.111	23	56	9	182.093	0.017462	0.108343	1
182.118	29	5	8	182.032	0.086661	0.108253	1
182.268	24	17	11	182.24	0.028117	0.107919	1
182.338	28	5	10	182.257	0.081621	0.10781	1
182.366	25	3	11	182.188	0.177314	0.108097	1
182.461	21	16	14	182.408	0.052415	0.107868	1
182.472	22	181	30	182.332	0.139806	0.107999	0
182.53	30	90	27	182.295	0.235191	0.108518	0
182.603	26	8	22	182.595	0.007751	0.108108	1
182.64	27	119	20	182.536	0.103723	0.10809	0
183.09	33	5	8	183.069	0.020387	0.107737	1
183.122	38	95	6	183.05	0.072237	0.107594	1
183.39	40	321	11	183.367	0.022718	0.107255	1
183.403	31	41	11	183.363	0.039995	0.106987	1
183.434	37	531	28	183.316	0.11841	0.107032	0
183.459	39	24	22	183.451	0.008053	0.106641	1
183.572	36	695	29	183.431	0.140828	0.106775	0
184.046	49	53	3	184.032	0.014552	0.106414	1
184.1	46	17	5	184.092	0.008031	0.106029	1
184.179	44	7	6	184.087	0.091287	0.105972	1
184.264	43	4	13	184.243	0.020879	0.105642	1
184.269	47	7	11	184.198	0.070689	0.105507	1
184.379	41	411	21	184.312	0.066476	0.105357	1
184.459	45	23	15	184.412	0.047085	0.105134	1
184.597	50	552	29	184.473	0.124855	0.105209	0
184.621	42	146	27	184.473	0.148477	0.105374	0
185.087	59	6	7	185.083	0.003765	0.104989	1
185.182	58	133	13	185.154	0.02828	0.104699	1
185.286	55	2	21	185.253	0.033594	0.104432	1
185.342	56	16	9	185.326	0.015686	0.1041	1
185.378	57	554	15	185.125	0.253182	0.104656	0
185.45	54	815	26	185.254	0.196175	0.104996	0
185.481	52	20	28	185.339	0.141611	0.105132	0
185.654	53	670	25	185.51	0.143658	0.105274	0
185.659	51	556	24	185.544	0.115627	0.105312	0
186.078	64	12	3	186.072	0.006026	0.104948	1
186.13	70	120	6	186.064	0.065542	0.104804	1
186.171	65	5	5	186.047	0.124123	0.104875	1
186.361	62	4	15	186.316	0.044133	0.104655	1
186.445	67	128	25	186.191	0.254039	0.105194	0
186.476	69	1	21	186.437	0.038329	0.104953	1
186.591	68	121	23	186.466	0.125033	0.105025	0
186.611	63	169	25	186.434	0.177071	0.105283	0
186.642	61	891	26	186.26	0.381186	0.106265	0
187.008	76	1	2	187.004	0.003845	0.105901	1
187.082	78	5	9	187.07	0.011417	0.105567	1
187.12	75	556	5	187.098	0.022063	0.105273	1
187.172	79	11	13	187.152	0.02025	0.104975	1
187.261	74	581	10	187.164	0.09665	0.104946	0
187.37	72	87	7	187.318	0.052481	0.104763	1
187.427	73	388	28	187.272	0.15536	0.104939	0
187.47	71	11	19	187.454	0.015744	0.10463	1
187.591	77	85	27	187.484	0.106989	0.104638	0
188.115	89	19	4	188.02	0.095002	0.104605	1
188.173	85	5	7	188.148	0.025024	0.104333	1
188.428	88	124	25	188.3	0.128368	0.104415	0
188.491	81	21	10	188.455	0.035783	0.104181	1
188.498	90	100	28	188.161	0.337242	0.104971	0
188.526	84	311	30	188.346	0.180652	0.105227	0
188.642	87	965	26	188.447	0.195233	0.10553	0
188.674	82	918	25	188.562	0.111395	0.10555	0
189.102	96	94	4	189.074	0.027809	0.10529	1
189.293	93	14	6	189.289	0.003965	0.104952	1
189.336	99	33	27	189.157	0.178644	0.105197	0
189.349	95	1	18	189.285	0.063602	0.105059	1
189.368	100	79	11	189.276	0.091392	0.105014	1
189.416	94	12	10	189.361	0.055051	0.10485	1
189.492	98	723	20	189.388	0.103823	0.104846	0
189.561	92	838	30	189.264	0.297041	0.105474	0
190.069	2	5	5	190.061	0.007512	0.105155	1
190.162	6	37	8	190	0.162231	0.105341	0
190.174	5	109	5	190.166	0.008093	0.105026	1
190.208	4	4	8	190.201	0.007852	0.104712	1
190.231	1	4	10	190.213	0.018039	0.104434	1
190.242	9	13	4	190.087	0.155336	0.104597	1
190.357	10	11	15	190.314	0.043138	0.104401	1
190.433	3	448	28	190.266	0.166924	0.1046	0
190.488	7	354	23	190.376	0.111596	0.104622	0
191.08	15	32	5	191.073	0.007631	0.104315	1
191.196	14	17	10	191.196	0	0.103986	1
191.362	16	22	17	191.349	0.01289	0.103699	1
191.449	11	52	22	191.421	0.028489	0.103464	1
191.481	12	38	21	191.349	0.131714	0.103552	0
191.63	20	184	27	191.512	0.117539	0.103595	0
191.664	18	71	31	191.43	0.234222	0.104001	0
191.695	19	55	28	191.56	0.134547	0.104096	0
192.078	30	17	4	192.064	0.013866	0.103817	1
192.108	29	9	9	192.1	0.007912	0.103522	1
192.154	22	12	6	192.147	0.007451	0.103227	1
192.204	21	94	16	192.18	0.024097	0.102985	1
192.227	28	8	17	192.18	0.046892	0.102814	1
192.247	24	47	3	192.243	0.003886	0.102514	1
192.309	25	3	14	192.294	0.015826	0.102251	1
192.457	26	1	22	192.445	0.011518	0.101977	1
192.477	27	92	29	192.337	0.140274	0.102092	0
193.037	32	33	5	193.033	0.004166	0.101798	1
193.045	38	13	2	193.041	0.004086	0.101506	1
193.33	40	814	14	193.18	0.150463	0.101652	0
193.394	33	1	20	193.342	0.0523	0.101505	1
193.423	35	42	13	193.39	0.032298	0.1013	1
193.434	39	24	16	193.427	0.007713	0.101023	1
193.535	31	294	14	193.398	0.136883	0.101128	0
193.572	36	367	28	193.455	0.117288	0.101176	0
194.028	41	17	5	194.015	0.012415	0.100916	1
194.064	50	2	4	194.015	0.048711	0.100763	1
194.075	48	14	3	194.063	0.012176	0.100505	1
194.211	44	4	14	194.203	0.007551	0.100235	1
194.265	43	41	16	194.188	0.077015	0.100167	1
194.273	45	242	16	194.266	0.007752	0.0999	1
194.348	42	153	20	194.191	0.156522	0.100063	0
195.011	58	1	2	195.003	0.007611	0.099798	1
195.085	60	5	9	195.052	0.033159	0.099607	1
195.119	55	7	5	195.111	0.007911	0.099345	1
195.229	57	11	16	195.187	0.041637	0.09918	1
195.321	59	1	17	195.285	0.03564	0.099	1
195.509	56	38	20	195.377	0.1318	0.099093	1
195.518	54	137	26	195.313	0.204853	0.099391	0
195.57	52	213	30	195.447	0.123414	0.099459	0
196.062	65	7	5	196.055	0.007552	0.099201	1
196.23	62	19	20	196.195	0.035464	0.099022	1
196.272	66	22	18	196.268	0.003785	0.098756	1
196.292	67	4	9	196.284	0.007953	0.098503	1
196.402	61	40	9	196.391	0.01133	0.098261	1
196.414	70	40	8	196.369	0.045139	0.098114	1
196.48	69	8	21	196.443	0.036527	0.097944	1
196.491	68	102	24	196.352	0.138757	0.098056	0
196.591	64	89	30	196.454	0.136316	0.098162	0
197.055	74	87	4	197.048	0.007332	0.097913	1
197.082	75	87	2	197.059	0.023175	0.097709	1
197.154	78	5	9	197.027	0.126646	0.097787	1
197.173	77	7	5	197.169	0.003985	0.097532	1
197.221	80	20	14	197.207	0.014036	0.097306	1
197.334	73	406	15	197.095	0.238299	0.097687	0
197.365	79	11	14	197.353	0.011419	0.097455	1
197.421	76	590	30	197.28	0.141033	0.097572	0
197.552	71	944	30	197.38	0.172513	0.097773	0
198.073	86	2	6	198.061	0.012298	0.097544	1
198.111	85	1	7	198.03	0.080239	0.097498	1
198.201	90	41	12	198.178	0.023035	0.0973	1
198.277	87	22	15	198.264	0.012619	0.097075	1
198.497	82	936	25	198.232	0.264566	0.097519	0
198.556	84	49	28	198.368	0.188805	0.097759	0
198.597	88	104	27	198.465	0.132085	0.09785	0
198.644	81	108	27	198.495	0.149436	0.097985	0
199.008	98	1	2	199.004	0.003886	0.097739	1
199.059	95	6	6	199.04	0.018828	0.097533	1
199.177	91	11	15	199.064	0.112722	0.097572	1
199.218	93	13	6	199.108	0.110773	0.097607	1
199.222	92	383	13	199.07	0.1519	0.097747	0
199.304	96	204	11	199.296	0.007992	0.097515	1
199.417	100	265	27	199.271	0.146459	0.097642	0
199.45	97	19	18	199.427	0.022808	0.097449	1
199.469	99	154	29	199.181	0.288154	0.097938	0
199.576	94	171	26	199.38	0.196759	0.098191	0
200.081	1	39	4	200.074	0.00787	0.09796	1
200.208	6	14	8	200	0.20826	0.098241	0
200.261	9	23	7	200.253	0.007912	0.098012	1
200.348	2	13	10	200.179	0.168571	0.09819	1
200.39	7	152	10	200.328	0.061689	0.098098	1
200.394	8	7	12	200.332	0.062355	0.098008	1
200.434	10	29	22	200.412	0.022054	0.097817	1
200.489	3	921	25	200.275	0.214555	0.09811	0
200.602	4	262	27	200.461	0.14077	0.098217	0
201.113	13	31	7	201.081	0.031532	0.09805	1
201.481	14	24	16	201.439	0.042302	0.097912	1
201.507	11	18	26	201.386	0.121228	0.09797	0
201.529	20	125	26	201.261	0.267706	0.09839	0
201.561	15	112	24	201.343	0.217826	0.098685	0
201.573	18	82	25	201.325	0.248271	0.099053	0
201.718	17	36	29	201.557	0.161129	0.099206	0
202.213	26	46	13	202.178	0.03525	0.099049	1
202.337	30	22	22	202.306	0.030567	0.098881	1
202.382	22	31	9	202.254	0.12817	0.098953	1
202.492	25	192	12	202.033	0.459194	0.099829	0
202.536	23	14	10	202.067	0.468932	0.100725	1
202.563	27	57	28	202.406	0.156624	0.100861	0
202.568	28	25	26	202.365	0.20309	0.101107	0
202.648	24	707	28	202.373	0.274846	0.101526	0
203.014	35	57	3	203.007	0.0069	0.101299	1
203.129	33	55	8	203.117	0.012045	0.101085	1
203.15	34	6	4	203.15	0	0.100843	1
203.154	40	87	5	203.056	0.097384	0.100835	1
203.193	37	19	2	203.005	0.188285	0.101043	1
203.262	36	56	17	203.251	0.011198	0.100829	1
203.448	31	656	25	203.329	0.119331	0.100873	0
203.511	38	340	31	203.369	0.14213	0.100971	0
204.23	42	14	13	204.179	0.050799	0.100852	1
204.232	46	14	5	204.187	0.045382	0.100722	1
204.29	43	94	12	204.243	0.047634	0.100597	1
204.303	44	53	13	204.156	0.14661	0.100705	1
204.33	50	3	15	204.179	0.150822	0.100822	1
204.366	45	1	20	204.358	0.008132	0.100606	1
204.398	48	22	20	204.394	0.004086	0.100382	1
205.026	53	18	3	205.022	0.004025	0.100158	1
205.068	52	13	2	205.012	0.055694	0.100055	1
205.088	54	57	6	205.05	0.038135	0.099912	1
205.174	60	5	6	205.162	0.011777	0.099709	1
205.331	56	36	20	205.316	0.014816	0.099514	1
205.427	55	18	12	205.377	0.04954	0.099399	1
205.463	59	17	13	205.45	0.012362	0.0992	1
205.491	58	478	30	205.273	0.218062	0.099471	0
205.552	57	75	31	205.415	0.13714	0.099557	0
206.089	65	7	2	206.053	0.035345	0.099411	1
206.2	68	17	13	206.184	0.015763	0.099222	1
206.243	69	4	8	206.235	0.007592	0.099014	1
206.316	63	4	12	206.303	0.012996	0.09882	1
206.361	67	25	11	206.34	0.020589	0.098644	1
206.378	70	82	7	206.352	0.025997	0.098481	1
206.411	61	22	14	206.315	0.096058	0.098475	1
206.49	66	398	27	206.274	0.215461	0.098737	0
206.51	64	673	27	206.361	0.149008	0.098849	0
207.088	80	12	2	207.06	0.027808	0.098691	1
207.114	71	22	9	207.087	0.026665	0.098531	1
207.142	74	39	4	207.111	0.031103	0.098381	1
207.245	76	279	15	207.056	0.189442	0.098583	0
207.252	75	23	18	207.234	0.01791	0.098405	1
207.309	77	8	21	207.29	0.019172	0.09823	1
207.432	79	290	24	207.321	0.111194	0.098259	0
208.049	86	2	7	208.031	0.017663	0.098082	1
208.064	81	3	4	208.05	0.013636	0.097897	1
208.145	85	136	10	208.137	0.008291	0.097702	1
208.256	83	20	14	208.239	0.016669	0.097525	1
208.256	82	2	19	208.236	0.020371	0.097357	1
208.26	89	16	12	208.196	0.064224	0.097285	1
208.269	88	30	6	208.176	0.09344	0.097277	1
208.273	87	7	7	208.225	0.048183	0.097171	1
208.301	84	361	14	208.114	0.187483	0.097366	0
209.072	99	100	4	209.069	0.003985	0.097165	1
209.081	92	68	4	209.008	0.072945	0.097113	1
209.2	100	10	9	209.162	0.03794	0.096986	1
209.23	98	40	15	209.215	0.015384	0.096812	1
209.403	93	691	29	209.26	0.142773	0.09691	0
209.423	91	8	19	209.326	0.097	0.09691	1
209.53	95	270	22	209.341	0.189567	0.097107	0
210.049	4	117	4	210.037	0.011588	0.096926	1
210.172	5	343	9	210.156	0.015263	0.096753	1
210.183	2	11	13	210.133	0.049703	0.096654	1
210.2	10	14	10	210.08	0.120515	0.096704	1
210.219	6	308	8	210	0.21871	0.09696	0
210.242	8	20	11	210.23	0.0115	0.096781	1
210.293	3	60	14	210.265	0.02781	0.096637	1
210.327	9	11	13	210.327	0	0.096435	1
210.418	7	298	19	210.329	0.088858	0.096419	0
210.434	1	460	19	210.329	0.104163	0.096435	0
211.06	16	19	8	211.056	0.003826	0.096243	1
211.06	11	17	3	211.057	0.003825	0.096052	1
211.141	18	15	7	211.117	0.023998	0.095903	1
211.232	17	13	6	211.085	0.1469	0.096008	1
211.285	14	16	9	211.199	0.08594	0.095987	1
211.415	19	721	21	211.261	0.154718	0.096108	0
211.438	13	110	26	211.207	0.230457	0.096383	0
211.541	15	578	24	211.339	0.201912	0.096599	0
211.576	12	48	29	211.384	0.191374	0.096793	0
212.046	29	6	9	212.038	0.007521	0.096611	1
212.15	25	63	4	212.126	0.023652	0.096462	1
212.18	24	95	5	212.079	0.101057	0.096472	1
212.193	28	9	6	212.189	0.004106	0.096285	1
212.407	27	512	18	212.235	0.171857	0.096437	0
212.439	26	73	26	212.287	0.15259	0.096551	0
212.443	23	24	21	212.403	0.039884	0.096437	1
212.471	30	34	20	212.382	0.088818	0.096421	1
212.555	22	381	17	212.425	0.130006	0.096489	0
213.072	37	7	2	213.044	0.027752	0.096351	1
213.095	38	59	5	213.08	0.015138	0.096189	1
213.216	40	56	9	213.175	0.040975	0.096079	1
213.231	32	17	7	213.223	0.007832	0.095904	1
213.311	31	171	22	213.279	0.031621	0.095776	1
213.424	34	19	13	213.342	0.081986	0.095749	1
213.458	35	4	17	213.455	0.003806	0.095567	1
213.488	36	62	30	213.359	0.129112	0.095633	0
213.502	39	428	24	213.388	0.114275	0.09567	0
214.02	43	5	3	214.007	0.012903	0.095507	1
214.222	41	91	14	214.214	0.007431	0.095335	1
214.225	42	3	19	214.206	0.019448	0.095186	1
214.479	49	586	29	214.252	0.226204	0.095442	0
214.501	48	164	29	214.315	0.186421	0.095619	0
214.534	47	900	22	214.296	0.237963	0.095896	0
214.552	44	164	29	214.417	0.134969	0.095972	0
215.028	53	11	5	215.024	0.003866	0.095794	1
215.22	57	162	13	215.193	0.0273	0.095661	1
215.377	59	1	17	215.325	0.051579	0.095576	1
215.391	58	7	11	215.076	0.315321	0.095999	1
215.403	51	18	12	215.355	0.047852	0.095907	1
215.469	52	45	27	215.28	0.189449	0.096086	0
215.518	54	996	32	215.355	0.163147	0.096215	0
216.008	62	1	2	216.004	0.003966	0.096039	1
216.035	69	19	4	216.026	0.008625	0.095872	1
216.156	63	250	10	216.059	0.097482	0.095875	0
216.194	64	12	3	216.155	0.039282	0.095767	1
216.277	65	18	11	216.249	0.028009	0.095639	1
216.321	67	4	13	216.301	0.019745	0.095495	1
216.354	61	24	22	216.35	0.003965	0.095322	1
216.357	68	229	21	216.247	0.109698	0.095349	0
216.557	66	249	30	216.418	0.138798	0.095431	0
217.241	79	11	8	217.077	0.16463	0.095561	1
217.265	78	11	13	217.22	0.045147	0.095466	1
217.37	76	789	13	217.048	0.322559	0.095892	0
217.378	75	76	11	217.305	0.073205	0.095849	1
217.401	80	20	11	217.359	0.042689	0.09575	1
217.425	77	8	18	217.351	0.073739	0.095709	1
217.445	73	854	28	217.238	0.206896	0.095916	0
218.045	83	308	2	218.037	0.008096	0.095753	1
218.054	90	12	3	218.018	0.036622	0.095643	1
218.062	86	2	7	218.047	0.015818	0.095496	1
218.066	88	9	6	218.05	0.015795	0.095349	1
218.074	85	3	4	218.026	0.048216	0.095262	1
218.339	89	24	23	218.323	0.015364	0.095115	1
218.36	81	161	21	218.266	0.093445	0.095112	0
218.428	87	216	12	218.248	0.179489	0.095266	1
218.518	82	724	30	218.359	0.159284	0.095383	0
219.135	99	39	7	219.06	0.074691	0.095346	1
219.16	100	10	8	219.152	0.008012	0.095187	1
219.19	98	35	12	219.15	0.03999	0.095086	1
219.206	94	13	8	219.097	0.109562	0.095113	1
219.25	95	12	9	219.23	0.0199	0.094976	1
219.318	91	11	15	219.299	0.01921	0.094839	1
219.438	97	12	16	219.415	0.023679	0.094711	1
219.469	96	17	11	219.346	0.123341	0.094762	1
219.485	92	15	14	219.407	0.078166	0.094733	1
219.53	93	149	26	219.404	0.126038	0.094789	0
220.007	4	8	2	220.004	0.003746	0.094626	1
220.021	2	16	2	220.007	0.014064	0.094481	1
220.036	8	24	5	220.028	0.008771	0.094328	1
220.325	10	104	11	220.283	0.042262	0.094236	1
220.368	6	161	8	220	0.367618	0.094722	0
220.486	9	410	15	220.3	0.186215	0.094885	0
220.516	7	332	23	220.409	0.10686	0.094906	0
220.536	5	140	26	220.245	0.29084	0.095253	0
220.539	1	1	17	220.405	0.134267	0.095322	1
220.56	3	541	28	220.283	0.277434	0.095643	0
221.015	12	1	2	221.008	0.006436	0.095486	1
221.035	11	37	2	221.027	0.007452	0.095331	1
221.065	17	20	6	221.061	0.003806	0.09517	1
221.215	15	17	3	221.211	0.004105	0.095011	1
221.237	18	85	6	221.199	0.037211	0.09491	1
221.312	20	11	15	221.241	0.070479	0.094867	1
221.436	13	536	27	221.208	0.227828	0.095099	0
221.466	14	281	30	221.278	0.188456	0.095261	0
221.49	19	520	30	221.317	0.172628	0.095395	0
222.062	24	309	3	222.051	0.011278	0.09525	1
222.066	21	20	6	222.059	0.007552	0.095098	1
222.09	22	12	4	222.027	0.063217	0.095043	1
222.224	30	29	22	222.184	0.040053	0.094948	1
222.265	27	17	15	222.19	0.075401	0.094914	1
222.343	23	10	9	222.3	0.043041	0.094825	1
222.347	25	7	7	222.312	0.035428	0.094723	1
222.392	29	1	19	222.372	0.020457	0.094596	1
222.406	26	165	28	222.236	0.170776	0.094727	0
222.431	28	41	11	222.427	0.004046	0.094572	1
223.077	35	2	5	223.069	0.008352	0.094425	1
223.1	32	255	5	223.092	0.008112	0.094278	1
223.141	34	35	7	223.129	0.011918	0.094138	1
223.145	33	69	7	223.062	0.083439	0.09412	1
223.15	39	12	8	223.106	0.044448	0.094036	1
223.188	36	49	14	223.176	0.011659	0.093897	1
223.225	37	7	6	223.214	0.011017	0.093757	1
223.245	31	13	8	223.109	0.135434	0.093827	1
223.29	40	11	15	223.203	0.08708	0.093816	1
223.435	38	72	31	223.295	0.140189	0.093894	0
224.035	44	3	6	224.03	0.004825	0.093745	1
224.123	43	1	2	224.053	0.070612	0.093706	1
224.185	45	10	5	224.18	0.005026	0.093558	1
224.201	48	24	16	224.132	0.068794	0.093517	1
224.213	47	229	16	224.169	0.043391	0.093433	1
224.287	46	11	13	224.272	0.015256	0.093303	1
224.298	41	63	7	224.077	0.221114	0.093515	1
224.307	50	109	20	224.132	0.174831	0.09365	1
224.323	42	12	10	224.244	0.078548	0.093625	1
224.335	49	17	7	224.323	0.012057	0.09349	1
225.098	51	7	4	225.038	0.05994	0.093435	1
225.154	59	9	10	225.15	0.004276	0.093288	1
225.323	56	25	3	225.319	0.003706	0.093141	1
225.343	52	120	7	225.215	0.127406	0.093198	1
225.426	58	370	26	225.254	0.171663	0.093326	0
225.43	53	317	27	225.167	0.262659	0.093603	0
225.45	60	55	11	225.327	0.123109	0.093651	1
225.524	54	402	30	225.378	0.14669	0.093737	0
225.597	55	65	26	225.469	0.128176	0.093793	0
226.034	67	3	3	226.023	0.01048	0.093658	1
226.062	64	11	7	226.03	0.032503	0.093559	1
226.119	68	23	11	226.054	0.065497	0.093513	1
226.245	61	11	13	226.177	0.067651	0.093472	1
226.504	65	964	26	226.359	0.144773	0.093554	0
226.544	66	29	19	226.532	0.011597	0.093422	1
226.682	70	123	28	226.458	0.224527	0.093633	0
226.708	63	497	31	226.513	0.195453	0.093797	0
226.742	62	209	31	226.241	0.500823	0.094449	0
227.036	76	239	3	227.031	0.004186	0.094304	1
227.106	74	12	2	227.03	0.076798	0.094276	1
227.185	73	7	11	227.133	0.051486	0.094208	1
227.332	78	5	9	227.282	0.050246	0.094138	1
227.339	75	217	22	227.243	0.095964	0.094141	0
227.415	77	367	21	227.404	0.011676	0.09401	1
227.47	72	360	30	227.343	0.12702	0.094063	0
228.158	83	10	10	228.028	0.129729	0.094119	1
228.382	86	74	29	228.245	0.136791	0.094186	0
228.432	85	9	12	228.424	0.007752	0.09405	1
228.451	90	120	10	228.295	0.155916	0.094147	1
228.515	82	24	19	228.507	0.008052	0.094012	1
228.531	88	852	27	228.335	0.196241	0.094173	0
229.012	98	2	3	229.008	0.004265	0.094032	1
229.12	99	20	5	229.04	0.079885	0.09401	1
229.136	93	13	6	229.07	0.065843	0.093966	1
229.179	92	13	7	229.128	0.050921	0.093898	1
229.202	96	10	13	229.186	0.015216	0.093776	1
229.221	100	11	11	229.187	0.033719	0.093682	1
229.269	94	29	19	229.262	0.007259	0.093548	1
229.307	97	11	17	229.287	0.019828	0.093434	1
229.307	95	11	15	229.21	0.097754	0.093441	1
229.344	91	97	14	229.32	0.023765	0.093333	1
230	4	1	0	230	0	0.093189	1
230.065	5	41	4	230.061	0.003786	0.093051	1
230.076	2	5	4	230.03	0.045874	0.092979	1
230.185	9	20	13	230.177	0.008052	0.092848	1
230.21	6	9	8	230	0.210263	0.093028	0
230.332	1	32	11	230.286	0.04601	0.092956	1
230.335	3	2	20	230.289	0.045959	0.092884	1
230.411	7	1	22	230.387	0.024071	0.092779	1
230.487	10	816	27	230.347	0.139948	0.092851	0
231.029	12	2	5	231.01	0.019479	0.092739	1
231.111	14	15	5	231.107	0.003846	0.092604	1
231.19	13	68	2	231.009	0.180817	0.092738	1
231.268	20	18	12	231.235	0.032964	0.092648	1
231.342	17	16	14	231.319	0.023474	0.092543	1
231.522	16	266	29	231.311	0.211481	0.092723	0
231.571	19	463	27	231.427	0.144655	0.092801	0
231.599	11	78	27	231.453	0.146243	0.092882	0
232.055	23	5	7	232.047	0.007592	0.092753	1
232.222	27	45	8	232.204	0.017577	0.09264	1
232.233	25	13	4	232.16	0.073373	0.092611	1
232.348	21	597	30	232.185	0.163549	0.092718	0
232.407	22	14	5	232.371	0.035677	0.092632	1
232.443	24	263	29	232.302	0.141198	0.092705	0
232.538	28	7	7	232.517	0.020678	0.092598	1
232.567	30	153	19	232.52	0.04681	0.092529	1
232.645	26	538	26	232.419	0.225936	0.092728	0
233.141	33	75	19	233.114	0.026744	0.09263	1
233.226	40	45	10	233.191	0.034947	0.092544	1
233.265	37	46	5	233.253	0.011409	0.092424	1
233.395	38	14	3	233.392	0.003886	0.092293	1
233.446	34	14	11	233.414	0.0316	0.092204	1
233.51	36	278	30	233.357	0.153788	0.092295	0
233.606	32	235	28	233.335	0.270741	0.092557	0
233.631	31	171	23	233.566	0.065278	0.092517	1
233.679	39	922	26	233.481	0.197667	0.092671	0
234.034	44	30	4	234.016	0.018142	0.092562	1
234.068	46	13	7	234.038	0.030561	0.092471	1
234.076	49	25	5	234.044	0.031809	0.092383	1
234.117	45	72	5	234.093	0.024381	0.092284	1
234.218	43	10	13	234.201	0.016794	0.092174	1
234.278	50	16	13	234.209	0.068364	0.092139	1
234.302	42	33	17	234.269	0.032628	0.092053	1
234.343	41	103	22	234.327	0.016244	0.091943	1
234.477	47	296	21	234.373	0.104423	0.091961	0
235.159	58	3	11	235.141	0.017814	0.091854	1
235.379	51	321	10	235.34	0.038595	0.091777	1
235.417	59	1	19	235.333	0.083327	0.091765	1
235.484	52	15	7	235.184	0.299694	0.092064	1
235.597	55	176	24	235.475	0.122309	0.092108	0
235.625	53	593	28	235.404	0.220892	0.092292	0
235.655	56	407	27	235.475	0.180491	0.092419	0
235.671	60	312	22	235.56	0.110627	0.092445	0
235.707	57	300	29	235.56	0.146482	0.092522	0
236.039	69	66	3	236.009	0.030473	0.092433	1
236.143	68	5	8	236.088	0.05475	0.09238	1
236.36	63	601	22	236.219	0.141786	0.09245	0
236.438	70	5	9	236.338	0.099633	0.09246	1
236.449	62	898	22	236.301	0.148184	0.092539	0
236.512	64	184	8	236.505	0.007591	0.092419	1
236.53	66	166	28	236.303	0.226811	0.092609	0
236.541	65	286	25	236.376	0.165557	0.092712	0
236.576	61	335	27	236.422	0.153971	0.092798	0
237.015	79	12	2	237.011	0.003686	0.092673	1
237.196	77	18	11	237.188	0.007992	0.092554	1
237.228	73	7	9	237.206	0.022435	0.092455	1
237.29	80	33	15	237.271	0.01865	0.092352	1
237.321	72	110	8	237.267	0.053318	0.092297	1
237.328	74	12	13	237.301	0.027029	0.092206	1
237.452	75	615	28	237.29	0.162242	0.092304	0
237.49	78	27	22	237.398	0.092205	0.092304	0
238.099	89	26	6	238.042	0.057355	0.092255	1
238.15	84	18	5	238.142	0.007972	0.092138	1
238.185	81	12	7	238.12	0.064934	0.0921	1
238.286	86	2	18	238.275	0.011178	0.091988	1
238.397	87	45	6	238.299	0.097788	0.091996	1
238.42	90	16	8	238.333	0.087195	0.091989	1
238.486	83	34	24	238.368	0.117773	0.092025	1
238.533	82	2	27	238.513	0.019748	0.091925	1
238.56	88	840	28	238.44	0.120191	0.091964	0
239.053	95	15	5	239.034	0.019583	0.091864	1
239.083	96	15	3	239.079	0.003966	0.091744	1
239.191	92	28	15	239.147	0.044112	0.091678	1
239.307	99	149	21	239.284	0.022858	0.091584	1
239.358	98	21	15	239.326	0.03137	0.091502	1
239.358	100	586	8	239.349	0.008411	0.091388	1
239.375	94	72	8	239.318	0.057178	0.091341	1
239.538	97	517	31	239.398	0.139825	0.091407	0
239.604	93	58	33	239.473	0.130765	0.091461	0
240.237	6	179	8	240	0.237313	0.091659	0
240.25	7	133	10	240.2	0.049413	0.091602	1
240.344	1	2	19	240.32	0.024281	0.091511	1
240.486	9	275	28	240.243	0.242785	0.091715	0
240.486	10	194	20	240.391	0.095235	0.09172	0
240.518	8	7	10	240.305	0.212753	0.091883	1
240.565	5	415	29	240.403	0.162497	0.091979	0
240.57	2	17	12	240.347	0.22348	0.092156	1
240.724	3	205	27	240.595	0.12928	0.092206	0
241.023	15	12	2	241.01	0.01332	0.0921	1
241.026	18	3	4	241.022	0.003685	0.091981	1
241.045	12	1	2	241.037	0.008666	0.09187	1
241.249	16	3	19	241.215	0.033684	0.091792	1
241.292	13	81	8	241.166	0.125479	0.091837	1
241.425	11	29	24	241.41	0.015725	0.091735	1
241.442	19	153	23	241.367	0.075121	0.091713	1
241.446	20	10	15	241.259	0.186631	0.091839	1
242.099	25	5	5	242.019	0.080008	0.091824	1
242.404	23	4	13	242.397	0.007551	0.091712	1
242.424	22	81	13	242.339	0.085235	0.091703	1
242.432	27	11	16	242.268	0.163878	0.091799	1
242.454	21	231	27	242.215	0.238893	0.091993	0
242.478	24	23	13	242.215	0.262829	0.092218	1
242.495	30	127	27	242.357	0.138237	0.092279	0
242.524	28	7	5	242.362	0.161683	0.09237	1
243.008	38	13	2	243.004	0.003786	0.092254	1
243.273	31	29	18	243.261	0.011918	0.092149	1
243.369	36	232	23	243.365	0.004005	0.092033	1
243.429	33	113	11	243.406	0.022544	0.091942	1
243.467	35	3	17	243.451	0.015915	0.091843	1
243.477	40	1	16	243.447	0.030156	0.091762	1
243.542	32	31	15	243.226	0.316427	0.092055	1
243.609	37	240	21	243.598	0.011478	0.09195	1
243.657	34	134	26	243.543	0.11461	0.09198	0
244.016	41	14	4	244.008	0.008091	0.091871	1
244.029	50	1	2	244.013	0.016649	0.091773	1
244.042	46	12	4	244.034	0.007712	0.091664	1
244.062	43	2	4	244.039	0.023382	0.091576	1
244.135	49	12	2	244.135	0	0.091458	1
244.151	47	10	9	244.147	0.003884	0.091345	1
244.28	45	2	21	244.217	0.06297	0.091308	1
244.314	48	65	12	244.24	0.074297	0.091286	1
244.463	42	226	29	244.339	0.123874	0.091328	0
245.029	53	11	4	245.012	0.016959	0.091233	1
245.244	57	6	14	245.202	0.042608	0.09117	1
245.302	60	5	6	245.035	0.267321	0.091396	1
245.319	51	21	10	245.307	0.011798	0.091294	1
245.334	56	373	10	245.127	0.207181	0.091442	0
245.366	52	88	13	245.151	0.215021	0.0916	0
245.375	55	523	21	245.166	0.209019	0.091749	0
245.393	59	2	23	245.349	0.04309	0.091687	1
246.024	62	8	4	246.01	0.014332	0.091589	1
246.148	66	11	7	246.14	0.008431	0.091483	1
246.165	64	161	5	246.157	0.007952	0.091378	1
246.323	67	8	19	246.13	0.192998	0.091506	1
246.338	68	10	11	246.223	0.114906	0.091536	1
246.407	70	8	23	246.39	0.016611	0.091441	1
246.419	61	32	21	246.321	0.098776	0.09145	1
246.526	65	20	12	246.443	0.082989	0.09144	1
246.604	63	651	28	246.493	0.11187	0.091466	0
247.008	76	1	2	247.004	0.004205	0.091356	1
247.026	75	16	4	247.015	0.011257	0.091255	1
247.209	72	16	9	247.161	0.048469	0.091202	1
247.262	80	30	10	247.246	0.015319	0.091107	1
247.33	79	13	10	247.133	0.196605	0.091239	1
247.342	74	13	12	247.246	0.095177	0.091244	1
247.355	77	55	13	247.322	0.032424	0.09117	1
247.38	78	231	19	247.353	0.026685	0.09109	1
247.425	71	336	23	247.317	0.108308	0.091111	0
248.097	89	18	5	248.089	0.008213	0.091008	1
248.159	84	12	5	248.146	0.012838	0.090911	1
248.224	86	3	19	248.216	0.007633	0.090808	1
248.224	90	17	14	248.212	0.012096	0.090711	1
248.446	88	528	26	248.317	0.129456	0.090759	0
248.471	81	29	17	248.417	0.054143	0.090713	1
248.521	82	2	25	248.502	0.018645	0.090625	1
248.591	85	131	25	248.454	0.137124	0.090682	0
248.697	87	105	28	248.561	0.135064	0.090736	0
249.101	100	14	7	249.067	0.033905	0.090667	1
249.202	96	41	14	249.164	0.038168	0.090602	1
249.214	98	36	10	249.17	0.044083	0.090545	1
249.222	99	16	10	249.045	0.176428	0.09065	1
249.316	95	3	20	249.306	0.010458	0.090552	1
249.357	97	11	16	249.334	0.022964	0.09047	1
249.433	91	73	27	249.411	0.02167	0.090386	1
249.497	94	141	27	249.378	0.119048	0.090421	0
250.095	5	55	2	250.07	0.025117	0.090341	1
250.123	9	11	4	250.123	0	0.090232	1
250.159	3	4	8	250.139	0.019812	0.090146	1
250.226	6	748	8	250	0.226198	0.090311	0
250.241	2	29	20	250.197	0.044078	0.090255	1
250.352	7	133	11	250.286	0.065683	0.090225	1
250.469	4	35	18	250.363	0.105933	0.090244	1
250.496	1	590	19	250.407	0.08955	0.090243	1
250.587	8	288	30	250.453	0.133486	0.090296	0
251	11	18	0	0	0.00025	0.090296	1	1
251.035	13	13	2	251.031	0.003765	0.090191	1
251.054	19	13	2	251.046	0.008008	0.090093	1
251.086	16	2	4	251.021	0.065243	0.090063	1
251.147	17	18	17	251.115	0.032036	0.089993	1
251.15	20	6	5	251.138	0.011674	0.089899	1
251.282	15	773	10	251.154	0.127655	0.089945	0
251.303	14	326	11	251.168	0.134466	0.089998	0
251.352	18	974	28	251.24	0.111875	0.090024	0
251.443	12	339	30	251.289	0.15332	0.090099	0
252.084	22	11	5	252.08	0.004145	0.089997	1
252.101	25	2	7	252.051	0.050218	0.08995	1
252.127	24	13	2	252.048	0.079582	0.089937	1
252.3	21	48	21	252.285	0.015624	0.089849	1
252.41	29	929	23	252.222	0.187891	0.089965	0
252.449	26	405	32	252.269	0.180332	0.090072	0
252.493	28	58	5	252.34	0.1521	0.090146	1
252.612	27	70	31	252.401	0.211045	0.090288	0
252.636	23	114	31	252.516	0.119746	0.090323	0
253.053	35	2	5	253.045	0.007812	0.090226	1
253.06	36	8	5	253.021	0.038887	0.090166	1
253.076	32	22	4	253.072	0.004106	0.090064	1
253.104	38	30	12	253.089	0.015483	0.089977	1
253.268	33	110	13	253.256	0.012139	0.089886	1
253.285	39	11	12	253.159	0.125977	0.089928	1
253.321	40	252	26	253.202	0.118398	0.089961	0
253.396	37	12	5	253.387	0.009433	0.089867	1
253.504	34	142	25	253.37	0.134253	0.089919	0
253.568	31	148	28	253.447	0.121063	0.089955	0
254.058	50	5	3	254.054	0.003805	0.089855	1
254.11	49	23	7	254.088	0.021733	0.089776	1
254.126	46	407	7	254.102	0.023974	0.089699	1
254.187	45	76	13	254.172	0.014966	0.089613	1
254.201	41	82	14	254.135	0.066098	0.089585	1
254.249	43	966	13	254.209	0.039684	0.089528	1
254.301	44	296	15	254.289	0.011898	0.089438	1
254.497	47	771	30	254.338	0.158935	0.089518	0
255.02	57	1	2	255.016	0.003826	0.089419	1
255.023	56	18	3	255.019	0.004104	0.089321	1
255.035	52	13	2	255.029	0.006128	0.089225	1
255.121	55	14	9	255.086	0.035766	0.089164	1
255.192	53	72	12	255.172	0.020246	0.089085	1
255.233	54	19	12	255.089	0.143438	0.089147	1
255.342	59	520	11	255.335	0.007892	0.089054	1
255.385	60	179	9	255.201	0.184535	0.089163	1
255.446	51	29	24	255.426	0.01989	0.089084	1
256.155	64	15	6	256.147	0.007692	0.088991	1
256.162	70	20	4	256.142	0.020852	0.088913	1
256.306	67	2	19	256.291	0.015343	0.08883	1
256.374	68	874	20	256.278	0.095784	0.088838	0
256.392	66	16	10	256.218	0.174255	0.088935	1
256.512	61	1	22	256.504	0.007832	0.088843	1
256.52	65	167	22	256.346	0.174067	0.088939	0
256.524	63	393	17	256.396	0.127219	0.088983	0
257.02	76	2	3	257.017	0.003806	0.088886	1
257.19	74	11	6	257.047	0.143589	0.088948	1
257.233	79	12	12	257.137	0.09598	0.088956	1
257.254	75	20	14	257.217	0.036864	0.088897	1
257.282	72	17	5	257.271	0.011118	0.08881	1
257.375	71	17	18	257.317	0.057567	0.088774	1
257.458	78	51	21	257.427	0.030864	0.088709	1
257.492	73	15	18	257.313	0.17938	0.088811	1
257.496	77	54	23	257.378	0.118149	0.088844	0
258.054	90	14	3	258.05	0.004006	0.088749	1
258.096	88	7	2	258.092	0.003846	0.088654	1
258.103	85	35	8	258.019	0.084734	0.08865	1
258.164	89	68	7	258.144	0.019291	0.088572	1
258.172	82	18	10	258.136	0.035174	0.088513	1
258.182	83	152	2	258.107	0.074662	0.088497	1
258.219	84	11	7	258.192	0.026063	0.088428	1
258.355	81	539	22	258.24	0.114964	0.088457	0
258.477	86	238	29	258.325	0.151834	0.088528	0
259.182	93	91	6	259.147	0.035017	0.088468	1
259.197	94	58	9	259.19	0.007671	0.088379	1
259.349	92	18	18	259.333	0.016163	0.088299	1
259.387	99	120	9	259.162	0.225533	0.088451	1
259.403	100	1	21	259.38	0.023842	0.088379	1
259.429	98	686	20	259.301	0.127148	0.088422	0
259.5	97	16	14	259.29	0.21056	0.088557	1
259.512	91	1	21	259.482	0.030894	0.088493	1
259.572	96	77	23	259.274	0.297513	0.088723	0
259.61	95	2	23	259.567	0.042524	0.088672	1
260.009	4	2	2	260.005	0.003946	0.088579	1
260.223	5	19	10	260.193	0.029596	0.088515	1
260.223	1	626	9	260.107	0.116528	0.088545	0
260.263	3	1	19	260.248	0.015164	0.088465	1
260.372	2	105	12	260.365	0.007871	0.088377	1
260.398	7	1	24	260.381	0.016025	0.088298	1
260.574	8	301	28	260.456	0.118426	0.088331	0
260.591	10	303	23	260.487	0.103983	0.088348	0
261.031	19	13	2	261.016	0.014351	0.088268	1
261.129	20	216	10	261.12	0.009092	0.088182	1
261.166	11	15	6	261.133	0.032706	0.088121	1
261.2	16	33	15	261.18	0.020508	0.088048	1
261.234	18	5	5	261.23	0.004064	0.087957	1
261.27	14	15	7	261.246	0.024659	0.087889	1
261.326	13	48	22	261.289	0.037479	0.087834	1
261.42	15	123	18	261.274	0.145468	0.087897	0
261.477	17	168	29	261.346	0.131771	0.087944	0
262	28	25	0	0	0.00025	0.087944	1	1
262.199	22	14	6	262.026	0.172134	0.088035	1
262.216	29	12	10	262.061	0.155552	0.088107	1
262.241	30	14	2	262.141	0.100101	0.08812	1
262.266	27	19	12	262.12	0.145976	0.088182	1
262.381	25	6	10	262.377	0.004106	0.088092	1
262.415	26	503	30	262.232	0.182758	0.088193	0
262.471	24	38	23	262.455	0.015964	0.088116	1
262.633	21	364	30	262.51	0.123414	0.088154	0
263.043	38	14	4	263.028	0.014353	0.088075	1
263.214	37	127	10	263.185	0.029942	0.088013	1
263.397	35	468	19	263.147	0.250296	0.088186	0
263.417	32	48	24	263.401	0.015963	0.088109	1
263.419	33	209	22	263.348	0.070337	0.08809	1
263.438	40	1	18	263.273	0.165145	0.088172	1
263.47	34	2	21	263.306	0.163781	0.088252	1
263.481	31	8	17	263.454	0.027319	0.088188	1
263.511	36	697	26	263.329	0.182428	0.088287	0
264.011	42	5	2	264.011	0	0.088194	1
264.161	48	19	7	264.089	0.071637	0.088177	1
264.184	50	14	10	264.165	0.019329	0.088104	1
264.282	45	5	11	264.139	0.143898	0.088163	1
264.284	46	24	25	264.247	0.037552	0.088109	1
264.289	44	6	6	264.277	0.011969	0.088029	1
264.344	47	18	21	264.328	0.016089	0.087954	1
264.464	49	64	29	264.321	0.142479	0.088011	0
264.53	41	741	28	264.408	0.122814	0.088047	0
265.101	60	164	6	265.09	0.011198	0.087967	1
265.12	59	169	7	265.116	0.003746	0.087879	1
265.213	53	15	8	265.198	0.015575	0.087803	1
265.244	55	10	13	265.232	0.011338	0.087724	1
265.248	56	15	6	265.209	0.038525	0.087672	1
265.372	51	1	23	265.347	0.024074	0.087606	1
265.387	54	614	29	265.273	0.114256	0.087634	0
266.045	64	21	3	266.022	0.023003	0.087567	1
266.152	61	1	4	266.138	0.014756	0.087491	1
266.273	68	140	15	266.157	0.115087	0.08752	1
266.302	67	4	12	266.282	0.019662	0.087449	1
266.331	63	11	27	266.306	0.024964	0.087385	1
266.347	66	54	7	266.328	0.018871	0.087314	1
266.374	70	15	5	266.37	0.004025	0.087228	1
266.461	69	93	15	266.358	0.103364	0.087244	0
267.075	76	29	4	267.046	0.028477	0.087184	1
267.087	72	14	7	267.075	0.012097	0.087106	1
267.188	79	12	11	267.174	0.013738	0.087031	1
267.294	73	21	9	267.042	0.251695	0.0872	1
267.298	74	31	4	267.241	0.056734	0.087169	1
267.313	77	308	9	267.203	0.11048	0.087193	1
267.347	80	19	11	267.341	0.005286	0.087109	1
267.423	75	8	20	267.254	0.169592	0.087193	1
267.432	71	11	22	267.41	0.021486	0.087126	1
267.469	78	553	29	267.341	0.127572	0.087167	0
268.041	83	9	2	268.03	0.010827	0.08709	1
268.122	87	7	6	268.026	0.096108	0.087099	1
268.147	84	12	4	268.143	0.003886	0.087014	1
268.232	86	242	12	268.177	0.05569	0.086982	1
268.297	82	72	13	268.286	0.011338	0.086905	1
268.491	89	222	28	268.26	0.230201	0.087051	0
268.512	81	509	27	268.388	0.124662	0.087089	0
268.545	88	672	27	268.399	0.145991	0.087149	0
268.565	85	196	25	268.392	0.173726	0.087236	0
269.02	96	343	4	269.015	0.004726	0.087153	1
269.022	92	20	4	269.011	0.011408	0.087076	1
269.074	91	6	9	269.054	0.019972	0.087009	1
269.138	93	33	6	269.069	0.068936	0.08699	1
269.201	97	11	20	269.159	0.041925	0.086945	1
269.328	94	28	14	269.295	0.032071	0.08689	1
269.384	95	2	19	269.352	0.03174	0.086834	1
269.396	98	33	16	269.307	0.089103	0.086837	1
269.438	100	446	29	269.254	0.183928	0.086934	0
270	4	1	0	270	0	0.086847	1
270.183	6	248	9	270	0.183068	0.086943	0
270.273	3	2	23	270.254	0.01923	0.086875	1
270.413	5	50	26	270.256	0.157456	0.086946	0
270.489	10	156	21	270.381	0.107973	0.086967	0
270.513	7	38	20	270.483	0.030181	0.08691	1
270.645	8	738	28	270.528	0.117678	0.086941	0
270.675	2	44	26	270.495	0.18031	0.087034	0
271.088	15	31	5	271.012	0.075621	0.087023	1
271.092	20	5	5	271.078	0.014775	0.086951	1
271.194	14	15	5	271.19	0.003826	0.086868	1
271.214	19	13	2	271.064	0.150344	0.086931	1
271.257	17	229	15	271.058	0.199091	0.087042	1
271.358	18	19	15	271.313	0.045134	0.087001	1
271.362	13	33	5	271.164	0.198114	0.087111	1
271.438	16	215	28	271.252	0.185369	0.087208	0
271.499	11	101	27	271.346	0.153479	0.087273	0
272.064	23	35	7	272.017	0.04649	0.087233	1
272.104	21	45	6	272.089	0.014909	0.087162	1
272.144	29	852	10	272.121	0.023162	0.087099	1
272.182	25	2	6	272.166	0.015638	0.087028	1
272.208	26	39	10	272.156	0.052334	0.086994	1
272.341	30	181	14	272.333	0.007891	0.086917	1
273.029	35	2	4	273.008	0.02151	0.086853	1
273.082	31	42	7	273.065	0.017082	0.086785	1
273.128	33	312	6	273.115	0.013224	0.086713	1
273.212	34	5	8	273.2	0.011856	0.08664	1
273.218	37	162	4	273.013	0.205002	0.086755	1
273.225	38	14	3	273.221	0.003806	0.086674	1
273.266	36	49	7	273.254	0.011718	0.086601	1
273.318	39	13	9	273.156	0.161624	0.086674	1
273.329	40	1	16	273.309	0.020262	0.08661	1
273.378	32	150	13	273.246	0.132063	0.086654	0
274.07	44	44	4	274.061	0.008292	0.086578	1
274.35	47	7	8	274.297	0.052626	0.086545	1
274.358	50	6	17	274.338	0.019459	0.08648	1
274.427	43	111	26	274.229	0.197396	0.086587	0
274.435	49	953	31	274.233	0.202657	0.086699	0
274.576	45	198	27	274.459	0.11742	0.086729	0
274.657	42	261	26	274.535	0.121249	0.086762	0
275.015	52	13	2	275.011	0.003866	0.086682	1
275.036	53	11	4	275.032	0.003786	0.086603	1
275.089	58	2	4	275.007	0.082176	0.086598	1
275.121	59	164	5	275.068	0.052889	0.086566	1
275.186	57	7	12	275.089	0.097409	0.086576	1
275.205	56	150	5	275.198	0.007492	0.086501	1
275.217	51	1	17	275.193	0.024712	0.086441	1
275.245	54	175	12	275.025	0.220153	0.086569	0
275.472	60	692	26	275.301	0.171531	0.086651	0
275.508	55	237	24	275.4	0.107362	0.08667	0
276.186	63	198	6	276.173	0.013687	0.086601	1
276.221	70	15	5	276.217	0.004125	0.086522	1
276.314	69	28	13	276.244	0.069599	0.086506	1
276.421	68	59	16	276.4	0.021251	0.086444	1
276.487	65	397	25	276.37	0.116829	0.086473	0
276.487	66	66	16	276.452	0.034872	0.086424	1
276.566	64	265	18	276.503	0.062826	0.086401	1
276.641	67	785	23	276.467	0.173958	0.086484	0
276.672	61	225	30	276.542	0.130087	0.086526	0
277.087	80	21	5	277.083	0.003826	0.086447	1
277.104	74	27	3	277.019	0.085617	0.086447	1
277.235	79	14	11	277.207	0.028248	0.086392	1
277.287	72	28	12	277.255	0.032166	0.08634	1
277.295	78	9	10	277.15	0.144417	0.086395	1
277.322	73	118	13	277.042	0.279394	0.086577	0
277.347	71	11	13	277.258	0.088369	0.086579	1
277.367	75	50	9	277.218	0.148301	0.086637	1
277.37	77	11	15	277.303	0.067799	0.086619	1
278.046	85	1	6	278.029	0.016961	0.086554	1
278.054	90	64	3	278.051	0.003725	0.086476	1
278.276	87	30	21	278.272	0.004026	0.086399	1
278.339	82	47	13	278.323	0.015323	0.086332	1
278.344	88	11	14	278.245	0.098562	0.086344	1
278.386	89	16	10	278.056	0.330164	0.086571	1
278.436	86	57	16	278.324	0.111953	0.086595	1
278.524	84	752	28	278.388	0.135681	0.086641	0
279.043	91	242	6	279.036	0.007432	0.086567	1
279.062	93	110	7	279.051	0.011707	0.086497	1
279.124	100	63	7	279.09	0.034068	0.086449	1
279.164	99	13	4	279.156	0.007831	0.086376	1
279.211	98	6	17	279.2	0.011917	0.086307	1
279.373	94	17	18	279.275	0.098204	0.086318	1
279.444	95	1	21	279.427	0.017364	0.086254	1
279.505	92	417	30	279.335	0.169218	0.086331	0
279.613	96	555	28	279.475	0.137797	0.086378	0
280.016	5	309	2	280.012	0.003985	0.086302	1
280.028	9	150	5	280.024	0.003966	0.086226	1
280.111	3	10	7	280.103	0.007893	0.086154	1
280.172	4	161	12	280.156	0.015443	0.086089	1
280.249	1	53	12	280.229	0.020229	0.086028	1
280.331	6	17	8	280	0.330584	0.086253	0
280.37	7	8	19	280.299	0.070471	0.086238	1
280.396	10	10	15	280.346	0.050626	0.086206	1
280.501	2	223	24	280.331	0.170121	0.086283	0
280.528	8	115	29	280.399	0.128585	0.086321	0
281.056	15	17	2	281.052	0.003825	0.086246	1
281.09	20	6	6	281.083	0.007513	0.086174	1
281.238	19	17	11	281.226	0.011833	0.086106	1
281.252	14	48	23	281.234	0.017565	0.086044	1
281.306	11	28	12	281.289	0.017004	0.085981	1
281.333	13	269	27	281.14	0.192485	0.086078	0
281.39	17	17	16	281.351	0.038748	0.086035	1
281.407	16	4	12	281.4	0.007772	0.085963	1
282.02	30	26	4	282.013	0.007352	0.085892	1
282.203	24	346	11	282.034	0.168504	0.085967	0
282.287	21	64	8	282.223	0.063999	0.085947	1
282.326	27	11	14	282.26	0.066574	0.08593	1
282.377	28	39	6	282.248	0.128797	0.085968	1
282.409	22	11	14	282.405	0.004105	0.085894	1
282.514	23	356	25	282.371	0.142412	0.085945	0
282.581	25	495	28	282.464	0.117914	0.085974	0
282.64	29	145	24	282.514	0.12675	0.086011	0
283.015	38	249	3	283.011	0.003886	0.085937	1
283.086	36	166	5	283.068	0.018255	0.085876	1
283.116	32	12	7	283.104	0.011579	0.085809	1
283.147	37	30	9	283.07	0.076684	0.085801	1
283.189	34	60	7	283.185	0.003765	0.085727	1
283.2	33	16	6	283.055	0.145072	0.085781	1
283.25	39	145	7	283.242	0.008072	0.085711	1
283.32	35	497	20	283.282	0.037967	0.085668	1
283.333	31	36	15	283.318	0.014505	0.085605	1
283.404	40	107	21	283.28	0.124071	0.085639	0
284.026	42	1	2	284.015	0.011096	0.085572	1
284.043	46	25	8	284.031	0.011918	0.085507	1
284.062	41	14	4	284.054	0.007831	0.085438	1
284.11	45	10	5	284.106	0.004066	0.085365	1
284.275	47	7	18	284.239	0.036202	0.085321	1
284.406	49	144	28	284.287	0.118927	0.085351	0
284.452	43	6	16	284.43	0.021951	0.085295	1
284.471	50	197	26	284.343	0.128067	0.085333	0
285.032	58	2	4	285.023	0.008971	0.085265	1
285.265	57	9	13	285.2	0.064743	0.085247	1
285.3	60	76	11	285.289	0.011118	0.085181	1
285.335	52	15	9	285.184	0.150964	0.08524	1
285.369	51	10	10	285.26	0.108773	0.08526	1
285.531	54	173	28	285.308	0.22308	0.085382	0
285.55	53	580	27	285.353	0.19721	0.085481	0
285.561	59	38	24	285.499	0.062132	0.08546	1
285.572	55	271	19	285.378	0.194095	0.085556	0
286.017	62	5	4	286.01	0.007651	0.085487	1
286.093	67	17	8	286.054	0.039313	0.085447	1
286.118	65	15	4	286.108	0.009603	0.08538	1
286.157	63	242	8	286.122	0.035264	0.085336	1
286.236	64	11	13	286.228	0.007432	0.085268	1
286.434	69	1	21	286.407	0.027265	0.085217	1
286.44	68	376	22	286.335	0.104862	0.085234	0
286.476	66	621	28	286.275	0.200957	0.085335	0
286.621	61	2	24	286.603	0.017483	0.085276	1
287.059	75	134	6	287.048	0.011598	0.085212	1
287.166	78	136	6	287.158	0.007832	0.085144	1
287.197	80	55	10	287.146	0.050746	0.085114	1
287.28	72	20	6	287.15	0.130324	0.085154	1
287.314	73	66	19	287.307	0.007573	0.085086	1
287.36	79	20	13	287.235	0.125493	0.085121	1
287.415	74	11	14	287.392	0.023196	0.085068	1
287.421	77	49	12	287.158	0.262505	0.085221	1
287.515	76	795	31	287.332	0.182798	0.085306	0
288.05	88	14	4	288.038	0.012551	0.085243	1
288.093	85	145	7	288.019	0.073352	0.085233	1
288.198	89	23	5	288.19	0.00787	0.085166	1
288.239	90	36	19	288.222	0.016802	0.085107	1
288.401	86	2	23	288.33	0.070916	0.085095	1
288.44	84	260	18	288.428	0.012058	0.085032	1
288.497	81	1	18	288.463	0.034066	0.084988	1
288.506	82	2	19	288.412	0.093476	0.084995	1
288.589	83	695	22	288.573	0.016104	0.084936	1
288.625	87	551	26	288.517	0.10809	0.084956	0
289.026	99	11	5	289.022	0.004124	0.084886	1
289.164	95	35	5	289.138	0.025936	0.084836	1
289.26	98	4	15	289.247	0.013211	0.084774	1
289.295	93	125	11	289.255	0.039999	0.084736	1
289.413	92	15	9	289.114	0.299112	0.084919	1
289.436	94	11	19	289.305	0.131533	0.084959	1
289.465	91	256	20	289.345	0.11955	0.084989	0
289.529	96	289	17	289.098	0.431039	0.085284	0
289.569	100	760	27	289.419	0.150746	0.08534	0
289.598	97	680	27	289.385	0.212943	0.085449	0
290	4	1	0	290	0	0.085376	1
290.098	5	11	6	290.061	0.036166	0.085334	1
290.166	7	11	12	290.144	0.021673	0.08528	1
290.241	6	319	8	290	0.240997	0.085412	0
290.256	8	8	16	290.244	0.011672	0.08535	1
290.322	1	9	10	290.306	0.016044	0.085291	1
290.371	3	7	12	290.189	0.182213	0.085373	1
290.373	10	10	13	290.353	0.020177	0.085318	1
290.508	2	782	24	290.39	0.117908	0.085345	0
290.531	9	130	29	290.314	0.217393	0.085457	0
291.046	15	17	2	291.031	0.015599	0.085398	1
291.065	20	102	6	291.043	0.022383	0.085345	1
291.09	14	15	7	291.086	0.003666	0.085276	1
291.193	17	13	7	291.071	0.122467	0.085307	1
291.263	13	15	6	291.222	0.040967	0.08527	1
291.287	16	11	17	291.237	0.049775	0.08524	1
291.308	11	29	17	291.244	0.064354	0.085223	1
291.335	12	16	18	291.308	0.026488	0.085173	1
291.452	19	251	29	291.175	0.277135	0.085334	0
292.197	27	446	8	292.189	0.008232	0.08527	1
292.203	22	63	7	292.191	0.011778	0.085208	1
292.419	26	35	10	292.324	0.095434	0.085217	1
292.496	21	89	10	292.376	0.119673	0.085245	1
292.505	25	5	11	292.404	0.101024	0.085259	1
292.525	30	131	15	292.378	0.146749	0.08531	1
292.529	28	252	9	292.455	0.074124	0.085301	1
292.558	23	135	23	292.442	0.115731	0.085326	0
292.618	29	90	16	292.403	0.214683	0.085433	1
292.741	24	453	28	292.62	0.120865	0.085463	0
293.007	39	19	2	293.003	0.003706	0.085395	1
293.016	38	13	2	293.012	0.004146	0.085328	1
293.149	34	16	8	293.112	0.037088	0.085288	1
293.244	33	4	11	293.236	0.007772	0.085223	1
293.251	35	860	11	293.04	0.211623	0.085328	0
293.278	36	215	16	293.22	0.057974	0.085305	1
293.284	40	80	21	293.151	0.132988	0.085345	0
293.302	31	11	8	293.166	0.135991	0.085387	1
294.021	50	1	2	294.011	0.009653	0.085324	1
294.025	42	1	2	294.017	0.007631	0.08526	1
294.08	44	5	5	294.08	0	0.08519	1
294.103	49	33	4	294.06	0.043491	0.085156	1
294.157	43	4	13	294.149	0.007951	0.085092	1
294.182	41	21	7	294.165	0.016938	0.085036	1
294.21	46	21	12	294.206	0.003926	0.084969	1
294.309	47	593	15	294.298	0.011218	0.084909	1
294.43	45	792	19	294.334	0.096011	0.084918	0
295.082	55	5	6	295.066	0.015365	0.084861	1
295.119	59	18	10	295.098	0.020843	0.084809	1
295.143	54	70	7	295.095	0.047826	0.084778	1
295.192	52	14	4	295.176	0.016341	0.084723	1
295.285	56	24	19	295.269	0.015582	0.084666	1
295.311	58	6	16	295.265	0.046313	0.084635	1
295.37	51	4	13	295.358	0.012178	0.084576	1
295.464	60	245	21	295.439	0.024549	0.084527	1
295.603	53	318	27	295.444	0.159053	0.084588	0
296.03	64	13	2	296.025	0.005092	0.084523	1
296.07	65	7	5	296.063	0.007471	0.08446	1
296.173	70	5	6	296.02	0.152732	0.084516	1
296.263	67	4	13	296.253	0.01017	0.084455	1
296.369	68	1	20	296.322	0.046951	0.084425	1
296.386	66	11	8	296.37	0.015894	0.08437	1
296.421	63	18	16	296.401	0.01957	0.084317	1
296.433	61	26	20	296.336	0.097114	0.084327	1
296.575	69	147	29	296.442	0.132932	0.084367	0
297.032	76	1	2	297.02	0.011659	0.084308	1
297.132	78	6	6	297.046	0.08625	0.08431	1
297.175	74	30	9	297.163	0.012038	0.084251	1
297.213	80	13	9	297.072	0.140921	0.084297	1
297.296	73	18	15	297.274	0.022385	0.084247	1
297.444	71	291	30	297.317	0.12718	0.084282	0
297.504	77	436	22	297.396	0.107649	0.0843	0
298	86	4	0	0	0.00025	0.0843	1	1
298.061	90	12	3	298.057	0.003965	0.084236	1
298.073	88	63	2	298.066	0.007492	0.084174	1
298.198	89	270	11	298.105	0.093166	0.084182	1
298.319	83	25	12	298.304	0.015364	0.084127	1
298.366	85	2	19	298.354	0.011996	0.084069	1
298.372	87	37	10	298.26	0.111098	0.08409	1
298.439	81	98	26	298.33	0.10971	0.084111	0
298.475	82	2	20	298.407	0.067457	0.084098	1
298.523	84	406	29	298.388	0.135026	0.084138	0
299.123	98	753	10	299.079	0.043191	0.084106	1
299.143	96	39	4	299.023	0.120092	0.084134	1
299.264	91	66	15	299.221	0.043132	0.084102	1
299.461	92	15	15	299.45	0.011638	0.084044	1
299.505	97	674	22	299.346	0.158676	0.084103	0
299.538	95	48	19	299.399	0.138925	0.084147	1
299.555	94	12	17	299.188	0.36699	0.084371	1
299.567	93	111	22	299.528	0.038954	0.084335	1
299.6	100	627	30	299.415	0.184847	0.084415	0
300.25	9	460	12	300.177	0.072851	0.084406	1
300.265	6	391	8	300	0.265177	0.084548	0
300.322	8	20	5	300.305	0.016542	0.084495	1
300.354	2	33	12	300.326	0.027783	0.08445	1
300.439	4	953	16	300.372	0.066943	0.084436	1
300.45	10	58	13	300.4	0.049469	0.084409	1
300.472	3	397	13	300.309	0.163718	0.084471	1
300.479	5	13	8	300	0.479196	0.084782	0
300.498	1	1	18	300.443	0.055762	0.084759	1
300.524	7	1	18	300.446	0.077846	0.084753	1
301.078	15	42	10	301.055	0.022137	0.084704	1
301.127	18	31	5	301.119	0.007632	0.084644	1
301.387	11	33	5	301.36	0.026876	0.084599	1
301.416	19	565	29	301.269	0.146912	0.084647	0
301.463	14	15	6	301.456	0.00745	0.084587	1
301.481	17	78	8	301.348	0.133326	0.084625	1
301.567	16	23	23	301.534	0.033083	0.084585	1
301.703	20	427	28	301.537	0.165503	0.084648	0
302.089	21	14	6	302.085	0.003806	0.084585	1
302.216	24	14	3	302.119	0.096962	0.084595	1
302.384	29	437	26	302.244	0.139952	0.084638	0
302.451	26	24	23	302.405	0.045464	0.084607	1
302.494	28	363	28	302.325	0.168745	0.084673	0
302.579	25	127	9	302.239	0.339714	0.084871	1
302.653	30	969	26	302.525	0.127654	0.084904	0
302.681	22	316	32	302.514	0.166604	0.084967	0
303.051	35	111	4	303.02	0.031286	0.084926	1
303.176	37	43	3	303.041	0.135031	0.084965	1
303.188	38	102	11	303.035	0.152877	0.085017	1
303.209	36	51	7	303.045	0.164122	0.085078	1
303.241	31	53	14	303.229	0.01227	0.085022	1
303.305	33	259	8	303.107	0.19805	0.085109	0
303.452	34	646	23	303.317	0.13546	0.085148	0
304.133	42	29	4	304.077	0.056639	0.085126	1
304.242	44	27	9	304.058	0.183825	0.085202	1
304.323	50	13	15	304.187	0.13658	0.085242	1
304.451	43	15	18	304.378	0.073208	0.085233	1
304.494	45	446	20	304.439	0.054912	0.085209	1
304.494	41	107	16	304.436	0.057573	0.085188	1
304.555	46	282	17	304.453	0.102263	0.085201	0
305.007	57	1	2	305.003	0.003786	0.085139	1
305.07	52	13	3	305.033	0.036863	0.085102	1
305.089	51	4	9	305.053	0.036163	0.085064	1
305.141	54	356	7	305.137	0.004046	0.085002	1
305.176	59	6	7	305.172	0.004025	0.08494	1
305.223	58	4	10	305.215	0.007551	0.084881	1
305.244	55	59	12	305.161	0.082481	0.084879	1
305.307	56	136	11	305.29	0.017046	0.084828	1
305.455	60	640	24	305.344	0.110409	0.084847	0
306.082	66	14	3	306.082	0	0.084782	1
306.142	65	156	3	306.041	0.100566	0.084794	1
306.153	69	4	8	306.14	0.012792	0.08474	1
306.211	62	6	18	306.199	0.011737	0.084684	1
306.227	61	18	8	306.123	0.103745	0.084699	1
306.281	70	5	10	306.167	0.114339	0.084721	1
306.289	64	65	13	306.242	0.047804	0.084693	1
306.308	68	9	8	306.237	0.07123	0.084683	1
306.395	67	1	24	306.377	0.017325	0.084632	1
307.022	79	12	2	307.007	0.014232	0.084579	1
307.109	73	149	5	307.102	0.007552	0.084521	1
307.127	80	11	6	307.114	0.013757	0.084467	1
307.25	76	25	13	307.176	0.073262	0.084459	1
307.295	74	44	8	307.291	0.003946	0.084398	1
307.376	78	11	15	307.339	0.036305	0.084362	1
307.396	71	16	20	307.322	0.073957	0.084354	1
307.512	77	362	26	307.384	0.12776	0.084387	0
308.18	86	13	8	308.119	0.061106	0.084369	1
308.184	88	181	6	308.166	0.018383	0.084319	1
308.326	84	60	14	308.241	0.084938	0.08432	1
308.358	82	24	18	308.35	0.007672	0.084262	1
308.366	90	36	18	308.31	0.056319	0.084241	1
308.479	83	24	22	308.468	0.011339	0.084187	1
308.518	87	27	5	308.306	0.21272	0.084283	1
308.544	81	889	22	308.452	0.092284	0.084289	0
308.686	89	501	29	308.556	0.129879	0.084323	0
309.099	94	48	4	309.086	0.013006	0.08427	1
309.12	92	13	4	309.038	0.08165	0.084268	1
309.226	98	44	12	309.199	0.026463	0.084225	1
309.283	99	21	15	309.275	0.008072	0.084168	1
309.346	95	32	16	309.313	0.032627	0.08413	1
309.369	91	8	21	309.34	0.028879	0.084089	1
309.373	96	994	12	309.173	0.20004	0.084175	0
310.014	4	2	2	310.009	0.005166	0.084116	1
310.069	9	14	4	310.018	0.051552	0.084092	1
310.162	6	97	8	310	0.162452	0.08415	0
310.236	8	126	7	310.224	0.011538	0.084096	1
310.252	3	6	11	310.21	0.041969	0.084065	1
310.259	5	178	6	310.19	0.068312	0.084053	1
310.403	10	72	14	310.385	0.017797	0.084004	1
310.43	1	4	12	310.411	0.018729	0.083956	1
310.485	7	182	26	310.441	0.043657	0.083926	1
310.496	2	24	24	310.457	0.03904	0.083893	1
311	19	55	0	0	0.00025	0.083893	1	1
311.109	17	14	7	311.105	0.003746	0.083834	1
311.15	12	20	13	311.129	0.021594	0.083788	1
311.222	14	15	5	311.218	0.004106	0.08373	1
311.226	20	12	11	311.098	0.127595	0.083762	1
311.26	11	20	6	311.252	0.007712	0.083706	1
311.311	16	178	14	311.291	0.02071	0.08366	1
311.348	13	221	28	311.186	0.162098	0.083717	0
312.014	29	31	3	312.01	0.004165	0.083659	1
312.047	30	14	4	312.02	0.026238	0.083617	1
312.146	26	12	8	312.138	0.008052	0.083561	1
312.199	24	11	13	312.171	0.02768	0.08352	1
312.243	28	10	5	312.086	0.156991	0.083574	1
312.305	22	15	10	312.285	0.019615	0.083527	1
312.331	27	44	18	312.203	0.128321	0.08356	1
312.404	25	173	24	312.392	0.012276	0.083508	1
313.019	32	66	4	313.008	0.011492	0.083456	1
313.032	40	35	6	313.015	0.017266	0.083407	1
313.142	33	114	7	313.138	0.003985	0.08335	1
313.145	37	6	5	313.122	0.023668	0.083306	1
313.24	39	13	9	313.157	0.08303	0.083306	1
313.315	38	29	16	313.276	0.038772	0.083274	1
313.378	34	25	12	313.37	0.008072	0.083219	1
313.411	36	22	22	313.385	0.026152	0.083178	1
313.494	31	106	29	313.367	0.127932	0.08321	0
314.022	50	5	4	314.014	0.00769	0.083155	1
314.033	42	1	3	314.026	0.00755	0.083101	1
314.079	43	51	7	314.063	0.015633	0.083052	1
314.08	46	11	5	314.075	0.004185	0.082995	1
314.257	45	16	7	314	0.256756	0.08312	0
314.316	48	61	15	314.249	0.06767	0.083109	1
314.424	44	2	23	314.412	0.012317	0.083058	1
314.432	49	926	29	314.107	0.325879	0.083233	0
314.442	47	13	4	314.326	0.116043	0.083257	1
314.522	41	607	31	314.376	0.145379	0.083301	0
315.013	57	1	3	315.009	0.003906	0.083244	1
315.074	53	15	6	315.054	0.019384	0.083198	1
315.153	60	5	7	315.091	0.061654	0.083183	1
315.184	56	15	9	315.176	0.007551	0.083129	1
315.236	52	18	13	315.228	0.007952	0.083075	1
315.402	59	1	23	315.38	0.022214	0.083031	1
315.45	55	24	25	315.389	0.060962	0.083015	1
315.466	54	427	14	315.432	0.034503	0.082981	1
316.027	68	7	4	316.012	0.014981	0.082932	1
316.102	69	37	8	316.039	0.063508	0.082918	1
316.185	65	53	13	316.157	0.028561	0.082879	1
316.273	63	3	6	316.269	0.003885	0.082823	1
316.279	70	13	2	316.178	0.101117	0.082836	1
316.29	64	23	15	316.241	0.049607	0.082812	1
316.34	62	85	18	316.312	0.027893	0.082773	1
316.451	61	5	11	316.443	0.007731	0.08272	1
316.474	66	157	31	316.239	0.234707	0.082828	0
316.491	67	163	25	316.38	0.111633	0.082848	0
317.251	71	16	18	317.236	0.015514	0.0828	1
317.254	79	121	13	317.134	0.119824	0.082827	1
317.364	76	3	19	317.345	0.018511	0.082781	1
317.436	75	13	12	317.293	0.143248	0.082824	1
317.464	78	14	13	317.448	0.015963	0.082777	1
317.487	77	8	22	317.461	0.025959	0.082736	1
318.017	90	12	3	318.014	0.003725	0.08268	1
318.045	81	7	5	318.037	0.008012	0.082628	1
318.045	89	19	4	318.029	0.016164	0.082581	1
318.165	84	37	6	318.066	0.098977	0.082592	1
318.32	83	197	18	318.189	0.131413	0.082627	1
318.363	85	100	13	318.263	0.099177	0.082638	1
318.389	86	112	7	318.283	0.106161	0.082655	1
318.408	82	2	19	318.279	0.128982	0.082688	1
318.416	87	111	21	318.341	0.075493	0.082683	1
318.425	88	5	15	318.23	0.194692	0.082761	1
319.008	98	1	2	319.004	0.004006	0.082706	1
319.058	91	102	4	319.035	0.022346	0.082664	1
319.104	97	29	4	319.098	0.006457	0.08261	1
319.175	94	235	10	319.161	0.014463	0.082562	1
319.315	96	17	12	319.295	0.020478	0.082519	1
319.347	92	136	16	319.331	0.015884	0.082472	1
319.365	95	1	20	319.274	0.091132	0.082478	1
319.426	99	419	22	319.413	0.013099	0.08243	1
319.46	100	1	22	319.433	0.027571	0.082392	1
319.611	93	418	29	319.482	0.129139	0.082424	0
320.05	2	17	5	320.038	0.012196	0.082375	1
320.076	3	10	7	320.066	0.009696	0.082325	1
320.11	10	148	5	320.102	0.007792	0.082273	1
320.135	8	296	5	320.131	0.003865	0.082218	1
320.161	7	6	8	320.147	0.013953	0.082171	1
320.181	5	11	6	320.074	0.107496	0.082188	1
320.195	6	116	8	320	0.195444	0.082267	0
320.234	4	4	12	320.222	0.012096	0.082218	1
320.293	9	51	20	320.266	0.026738	0.08218	1
320.296	1	499	20	320.18	0.116322	0.082203	0
321.092	14	123	6	321.067	0.024893	0.082164	1
321.124	20	5	6	321.053	0.070931	0.082156	1
321.204	17	26	12	321.074	0.129706	0.082189	1
321.255	15	89	11	321.247	0.007892	0.082137	1
321.309	13	77	11	321.171	0.138519	0.082176	1
321.337	11	16	11	321.325	0.011778	0.082128	1
321.398	19	16	10	321.383	0.015799	0.082082	1
321.41	12	7	20	321.375	0.035275	0.08205	1
322.152	21	13	6	322.095	0.0575	0.082033	1
322.187	22	269	5	322.179	0.007992	0.081982	1
322.195	23	2	20	322.175	0.019842	0.081939	1
322.257	27	12	10	322.149	0.108887	0.081958	1
322.262	24	12	3	322.219	0.042138	0.08193	1
322.363	26	34	23	322.355	0.008251	0.08188	1
322.398	28	11	16	322.368	0.030385	0.081844	1
322.464	30	71	26	322.442	0.022123	0.081804	1
322.559	29	33	15	322.523	0.03611	0.081772	1
322.6	25	435	31	322.485	0.11546	0.081795	0
323.123	32	204	8	323.05	0.073061	0.081789	1
323.18	35	110	9	323.16	0.020333	0.081747	1
323.264	37	91	14	323.241	0.023352	0.081707	1
323.28	36	782	8	323.173	0.107367	0.081725	1
323.362	34	433	31	323.229	0.13245	0.08176	0
323.459	40	104	12	323.445	0.013478	0.081713	1
323.472	31	22	22	323.343	0.129025	0.081745	1
323.487	39	13	10	323.476	0.011055	0.081697	1
324.03	41	14	4	324.022	0.008051	0.081647	1
324.304	49	19	14	324.292	0.011478	0.081599	1
324.313	43	15	14	324.269	0.043822	0.081574	1
324.35	45	459	30	324.231	0.11883	0.081599	0
324.369	48	875	30	324.203	0.165124	0.081656	0
324.381	47	7	11	324.266	0.11576	0.081679	1
324.446	42	106	16	324.331	0.114349	0.081701	1
324.493	50	42	18	324.481	0.011778	0.081653	1
324.584	46	15	8	324.573	0.011497	0.081606	1
324.677	44	238	29	324.655	0.021546	0.081565	1
325.091	54	5	6	325.079	0.012037	0.081518	1
325.104	51	3	6	325.078	0.02553	0.081481	1
325.184	59	229	9	325.172	0.011757	0.081434	1
325.328	52	23	15	325.302	0.026005	0.081396	1
325.465	58	3	20	325.369	0.095949	0.081406	1
325.494	60	187	27	325.39	0.103795	0.081421	0
325.558	57	706	28	325.442	0.11578	0.081444	0
325.602	55	603	24	325.484	0.118714	0.081469	0
326.131	65	71	8	326.083	0.048291	0.081447	1
326.187	63	42	8	326.184	0.003705	0.081395	1
326.359	66	37	24	326.321	0.037539	0.081365	1
326.453	70	165	17	326.374	0.079375	0.081364	1
326.466	61	360	13	326.394	0.072125	0.081358	1
326.509	64	94	9	326.289	0.220074	0.081451	1
326.521	68	14	11	326.344	0.177019	0.081515	1
326.584	67	2	21	326.551	0.032635	0.081482	1
326.607	62	327	28	326.446	0.161679	0.081536	0
327.137	78	469	5	327.011	0.125615	0.081565	0
327.18	76	20	9	327.168	0.011938	0.081519	1
327.212	75	13	11	327.118	0.093784	0.081527	1
327.253	79	12	13	327.212	0.040798	0.0815	1
327.272	77	10	13	327.224	0.047855	0.081477	1
327.296	71	80	18	327.276	0.01989	0.081436	1
327.507	74	206	27	327.386	0.121193	0.081463	0
328.048	84	12	5	328.036	0.012296	0.081417	1
328.089	82	71	5	328.08	0.009081	0.081369	1
328.099	86	101	6	328.076	0.022717	0.08133	1
328.177	90	452	8	328.141	0.036115	0.0813	1
328.252	83	145	9	328.211	0.041124	0.081273	1
328.308	85	1	19	328.292	0.015843	0.08123	1
328.458	87	173	26	328.44	0.018293	0.081188	1
328.572	81	485	29	328.389	0.182913	0.081255	0
328.649	89	230	30	328.517	0.132884	0.081289	0
329.179	100	4	9	329.167	0.011817	0.081243	1
329.227	95	328	9	329.209	0.017519	0.081201	1
329.248	96	9	7	329.06	0.188847	0.081272	1
329.509	98	934	31	329.338	0.171218	0.081332	0
329.529	92	287	31	329.315	0.213723	0.081419	0
329.556	91	29	21	329.486	0.070688	0.081412	1
330	6	14	0	0	0.00025	0.081412	1	1
330.008	4	2	2	330.003	0.004166	0.081361	1
330.054	1	6	6	330.035	0.019081	0.08132	1
330.189	9	39	7	330.185	0.003686	0.081269	1
330.21	5	11	6	330.064	0.145635	0.081311	1
330.293	7	406	16	330.243	0.05009	0.081291	1
330.373	3	394	30	330.16	0.212045	0.081377	0
330.394	8	7	19	330.168	0.225983	0.081472	1
330.516	2	532	26	330.326	0.189988	0.081543	0
331.017	19	25	3	331.007	0.009692	0.081496	1
331.184	15	11	5	331.125	0.059378	0.081481	1
331.246	14	15	9	331.242	0.003786	0.08143	1
331.286	17	134	14	331.274	0.011718	0.081385	1
331.309	11	15	12	331.3	0.009251	0.081338	1
331.465	18	2	24	331.378	0.08654	0.081341	1
331.471	12	113	15	331.342	0.129392	0.081372	1
331.473	20	8	20	331.438	0.034612	0.081342	1
331.536	16	14	12	331.504	0.031869	0.08131	1
331.631	13	736	30	331.407	0.224263	0.081403	0
332.023	21	22	3	332.019	0.003744	0.081352	1
332.155	23	6	6	332.151	0.003925	0.081302	1
332.338	24	586	3	332.335	0.003746	0.081251	1
332.401	30	637	28	332.272	0.129864	0.081283	0
332.446	25	977	20	332.327	0.119254	0.081308	0
332.45	29	946	25	332.26	0.190616	0.081379	0
332.534	22	159	29	332.401	0.133413	0.081412	0
333.077	38	88	3	333.073	0.003684	0.081362	1
333.176	32	28	15	333.074	0.102178	0.081375	1
333.217	34	5	8	333.145	0.071712	0.081369	1
333.455	33	62	23	333.438	0.016815	0.081327	1
333.465	36	430	29	333.263	0.202138	0.081405	0
333.515	40	2	20	333.383	0.132799	0.081439	1
333.599	37	5	10	333.397	0.202071	0.081516	1
333.716	31	730	28	333.589	0.126154	0.081545	0
334	45	16	0	0	0.00025	0.081545	1	1
334.028	41	14	4	334.011	0.017092	0.081504	1
334.032	43	1	2	334.025	0.007652	0.081456	1
334.059	46	37	6	334.036	0.022826	0.081418	1
334.154	50	54	12	334.092	0.061631	0.081406	1
334.161	47	36	8	334.132	0.029616	0.081372	1
334.266	49	172	11	334.071	0.195256	0.081446	0
334.3	44	21	12	334.215	0.084742	0.081448	1
334.326	42	3	17	334.242	0.083714	0.081449	1
335.016	58	182	3	335.007	0.008792	0.081403	1
335.02	57	1	2	335.012	0.007792	0.081355	1
335.053	54	5	7	335.032	0.021021	0.081317	1
335.061	51	37	8	335.04	0.02031	0.081278	1
335.111	60	5	7	335.099	0.011657	0.081233	1
335.229	53	15	9	335.217	0.011698	0.081189	1
335.27	59	12	6	335.256	0.014135	0.081146	1
335.285	56	20	5	335.233	0.052138	0.081127	1
335.416	55	418	21	335.4	0.016225	0.081086	1
335.488	52	516	31	335.345	0.142574	0.081125	0
336.056	64	12	3	336.052	0.003686	0.081076	1
336.149	70	19	5	336.142	0.007472	0.081029	1
336.273	63	15	7	336.238	0.034704	0.081	1
336.276	61	3	11	336.265	0.011559	0.080955	1
336.3	67	10	13	336.288	0.012278	0.080912	1
336.391	66	52	19	336.341	0.050785	0.080893	1
336.4	69	519	17	336.173	0.226962	0.080985	0
336.436	68	78	10	336.225	0.210565	0.081068	1
337.029	76	5	3	337.019	0.00985	0.081022	1
337.208	74	81	7	337.168	0.040601	0.080997	1
337.22	77	9	9	337.212	0.007732	0.08095	1
337.234	78	227	6	337.026	0.207772	0.081031	0
337.286	80	11	12	337.274	0.012377	0.080987	1
337.29	73	8	15	337.285	0.004966	0.080939	1
337.354	71	113	12	337.332	0.022302	0.080902	1
337.368	79	150	15	337.328	0.040877	0.080877	1
338.132	83	9	2	338.052	0.079957	0.080876	1
338.375	81	11	13	338.14	0.234965	0.080974	1
338.379	88	6	9	338.355	0.023841	0.080938	1
338.391	89	98	13	338.351	0.039536	0.080911	1
338.414	87	93	24	338.355	0.058581	0.080897	1
338.418	82	10	15	338.301	0.116884	0.08092	1
338.49	85	1	16	338.478	0.011697	0.080877	1
338.567	84	24	20	338.226	0.341301	0.08104	1
338.613	86	2	17	338.599	0.013998	0.080998	1
338.645	90	457	28	338.527	0.118308	0.081021	0
339.116	95	581	8	339.105	0.011378	0.080978	1
339.129	93	128	9	339.063	0.065984	0.080968	1
339.132	96	13	9	339.051	0.08134	0.080969	1
339.19	99	23	7	339.181	0.008832	0.080923	1
339.24	92	25	10	339.228	0.012438	0.080881	1
339.325	98	294	13	339.314	0.011319	0.080837	1
339.371	100	1	18	339.359	0.012358	0.080794	1
339.394	94	35	18	339.345	0.04875	0.080774	1
340	2	7	0	0	0.00025	0.080774	1	1
340.054	3	22	3	340.041	0.013309	0.080732	1
340.155	5	520	2	340.141	0.014506	0.080691	1
340.229	10	17	11	340.183	0.045644	0.080669	1
340.233	9	45	13	340.203	0.029656	0.080638	1
340.264	6	10	8	340	0.264167	0.080752	0
340.304	8	268	14	340.241	0.062789	0.080741	1
340.312	7	55	11	340.176	0.135922	0.080775	1
340.369	1	472	22	340.232	0.136605	0.08081	0
341.196	20	53	11	341.092	0.103878	0.080824	1
341.208	19	16	8	341.148	0.059747	0.080811	1
341.348	14	358	12	341.11	0.237998	0.080908	0
341.374	11	51	19	341.353	0.021708	0.080871	1
341.397	12	324	25	341.204	0.193233	0.080941	0
341.481	18	2	19	341.469	0.012217	0.080899	1
341.505	15	210	26	341.304	0.20141	0.080973	0
341.623	13	355	28	341.496	0.126859	0.081001	0
342.108	28	7	5	342.1	0.007612	0.080956	1
342.154	26	5	10	342.127	0.026997	0.080923	1
342.23	21	15	11	342.195	0.034805	0.080894	1
342.248	23	92	21	342.193	0.054981	0.080878	1
342.252	25	16	9	342.237	0.015044	0.080838	1
342.267	30	23	2	342.267	0	0.080788	1
342.291	24	11	13	342.275	0.015719	0.080748	1
342.363	29	1	20	342.331	0.032433	0.080718	1
342.409	22	75	22	342.391	0.018606	0.08068	1
343.099	36	8	5	343.09	0.009289	0.080636	1
343.254	38	42	11	343.199	0.055411	0.080621	1
343.262	31	20	10	343.131	0.131873	0.080652	1
343.34	39	11	12	343.286	0.053195	0.080635	1
343.407	37	24	20	343.399	0.008172	0.080591	1
343.421	34	858	23	343.4	0.021422	0.080555	1
344.058	50	146	3	344.055	0.003725	0.080508	1
344.125	49	12	2	344.125	0	0.080459	1
344.146	44	4	15	344.139	0.007652	0.080414	1
344.222	46	13	4	344.194	0.028624	0.080383	1
344.331	45	1	15	344.318	0.012489	0.080341	1
344.344	43	39	16	344.213	0.130215	0.080372	1
344.364	47	46	10	344.257	0.107222	0.080388	1
344.378	42	210	19	344.286	0.09151	0.080395	1
344.401	48	15	7	344.389	0.012038	0.080353	1
344.466	41	571	29	344.258	0.207785	0.080431	0
345.02	53	11	4	345.016	0.004106	0.080384	1
345.173	60	7	3	345.044	0.129396	0.080414	1
345.189	59	3	6	345.185	0.003746	0.080367	1
345.234	55	1	20	345.198	0.035919	0.08034	1
345.446	56	473	24	345.328	0.117655	0.080363	0
345.487	57	462	29	345.306	0.180869	0.080424	0
346.056	64	14	3	346.051	0.004846	0.080378	1
346.06	66	360	5	346.026	0.033613	0.08035	1
346.067	69	172	7	346.047	0.019891	0.080313	1
346.107	65	16	5	346.103	0.003786	0.080267	1
346.221	63	12	13	346.201	0.020174	0.080231	1
346.332	68	57	19	346.26	0.072385	0.080226	1
346.359	70	75	23	346.333	0.025945	0.080193	1
346.375	67	70	23	346.35	0.02433	0.08016	1
347.023	76	51	5	347.011	0.011882	0.080118	1
347.067	77	87	2	347.04	0.026634	0.080086	1
347.131	75	5	6	347.099	0.032562	0.080058	1
347.235	79	12	12	347.194	0.040977	0.080034	1
347.239	78	14	11	347.209	0.029589	0.080004	1
347.28	73	33	11	347.269	0.011418	0.079963	1
347.364	80	22	20	347.348	0.015655	0.079924	1
347.372	74	29	17	347.321	0.051798	0.079907	1
347.385	71	11	23	347.334	0.051292	0.07989	1
348.072	84	11	7	348.068	0.003965	0.079844	1
348.267	90	38	18	348.248	0.019369	0.079808	1
348.444	89	50	13	348.276	0.16824	0.079861	1
348.575	85	53	13	348.415	0.160161	0.079909	1
348.612	81	29	19	348.55	0.06222	0.079899	1
348.67	82	38	21	348.654	0.016044	0.07986	1
348.712	83	246	29	348.506	0.205837	0.079936	0
349.028	95	3	4	349.024	0.003746	0.07989	1
349.295	97	20	8	349.257	0.037477	0.079865	1
349.334	99	554	22	349.316	0.018425	0.079828	1
349.378	100	3	15	349.312	0.066201	0.07982	1
349.388	92	19	14	349.231	0.156581	0.079866	1
349.429	94	46	12	349.409	0.019367	0.07983	1
349.445	98	44	14	349.425	0.020405	0.079794	1
350	6	10	0	0	0.00025	0.079794	1	1
350.158	3	12	6	350.114	0.043792	0.079773	1
350.223	4	20	11	350.197	0.026073	0.079741	1
350.264	5	324	16	350.244	0.020607	0.079706	1
350.3	1	4	9	350.288	0.011839	0.079666	1
350.339	9	11	13	350.339	0	0.079619	1
350.461	2	48	19	350.355	0.105872	0.079634	1
350.52	10	253	19	350.395	0.125371	0.079661	1
350.573	8	442	26	350.433	0.139591	0.079697	0
350.734	7	859	24	350.605	0.128893	0.079726	0
351	11	18	0	0	0.00025	0.079726	1	1
351.028	17	597	3	351.016	0.012364	0.079686	1
351.033	19	44	5	351.023	0.010072	0.079645	1
351.173	20	295	9	351.057	0.115961	0.079666	0
351.224	12	15	12	351.181	0.043662	0.079645	1
351.23	13	11	7	351.215	0.014543	0.079607	1
351.316	18	21	12	351.267	0.049222	0.079589	1
351.434	16	30	14	351.418	0.015944	0.079551	1
351.479	14	652	27	351.356	0.123549	0.079577	0
352.008	30	14	2	352.004	0.003946	0.079533	1
352.049	29	30	6	352.024	0.025236	0.079501	1
352.101	24	25	3	352.057	0.043919	0.07948	1
352.123	26	10	9	352.115	0.00775	0.079438	1
352.211	27	918	12	352.198	0.013825	0.079399	1
352.22	25	87	8	352.154	0.065457	0.079391	1
352.248	28	6	9	352.24	0.007812	0.079349	1
352.267	23	3	14	352.263	0.003666	0.079304	1
353.051	35	2	4	353.039	0.012115	0.079265	1
353.136	33	7	5	353.093	0.043114	0.079244	1
353.15	40	646	5	353.132	0.018115	0.079208	1
353.185	34	6	7	353.185	0	0.079162	1
353.193	39	11	6	353.047	0.146072	0.079201	1
353.277	37	6	8	353.219	0.058345	0.079189	1
353.292	38	15	8	353.258	0.034227	0.079163	1
353.322	31	9	6	353.177	0.144804	0.079201	1
353.341	36	19	12	353.181	0.160064	0.079248	1
353.471	32	305	30	353.32	0.151024	0.07929	0
354.008	49	13	2	354.004	0.004066	0.079246	1
354.05	41	32	5	354.042	0.00782	0.079204	1
354.057	50	2	4	354.039	0.018205	0.079169	1
354.241	47	263	5	354.171	0.069381	0.079163	1
354.263	45	48	23	354.215	0.047774	0.079145	1
354.267	46	22	17	354.233	0.034089	0.079119	1
354.305	44	33	13	354.183	0.121884	0.079144	1
354.365	48	24	22	354.351	0.013502	0.079106	1
354.396	42	72	16	354.385	0.011597	0.079066	1
355.02	53	152	2	355.012	0.007552	0.079025	1
355.028	56	26	3	355.024	0.003946	0.078982	1
355.07	51	3	3	355.066	0.004086	0.078938	1
355.224	59	21	6	355.198	0.026361	0.078908	1
355.258	57	6	12	355.246	0.011698	0.078869	1
355.309	58	371	13	355.039	0.269541	0.078979	0
355.327	52	312	11	355.259	0.068314	0.078973	1
355.38	54	3	18	355.359	0.0208	0.078939	1
355.487	60	754	25	355.365	0.121896	0.078964	0
356.008	62	2	2	356.008	0	0.078919	1
356.074	63	3	4	356.07	0.004025	0.078875	1
356.079	70	10	5	356.043	0.035831	0.078851	1
356.121	66	12	3	356.118	0.003685	0.078807	1
356.206	65	26	10	356.202	0.003766	0.078764	1
356.291	68	1	22	356.243	0.048435	0.078747	1
356.308	61	2	17	356.268	0.039732	0.078724	1
356.376	67	153	19	356.361	0.015523	0.078688	1
356.467	69	203	29	356.316	0.151032	0.07873	0
357.036	76	29	3	357.008	0.027664	0.0787	1
357.138	71	159	13	357.123	0.015705	0.078664	1
357.277	74	28	11	357.266	0.011519	0.078626	1
357.316	77	66	17	357.27	0.046133	0.078607	1
357.324	73	648	26	357.187	0.136331	0.07864	0
357.356	75	37	10	357.171	0.184933	0.078701	1
357.368	78	17	11	357.292	0.075838	0.078699	1
357.407	80	361	8	357.387	0.019871	0.078666	1
357.57	79	155	27	357.453	0.116175	0.078687	0
358.028	89	14	5	358.007	0.020256	0.078654	1
358.08	85	35	8	358.031	0.049225	0.078637	1
358.135	87	35	5	358.117	0.018318	0.078603	1
358.21	90	15	7	358.198	0.011518	0.078565	1
358.239	84	39	6	358.236	0.003706	0.078522	1
358.306	83	60	13	358.247	0.058683	0.078511	1
358.329	81	1	23	358.311	0.018309	0.078476	1
358.334	88	213	10	358.276	0.057848	0.078465	1
358.391	82	2	20	358.38	0.011777	0.078427	1
359.027	91	3	3	359.008	0.019401	0.078393	1
359.061	99	11	5	359.044	0.017135	0.078359	1
359.079	96	28	5	359.031	0.048646	0.078342	1
359.129	93	14	6	359.125	0.003725	0.078299	1
359.158	100	107	16	359.103	0.055816	0.078287	1
359.259	98	104	18	359.244	0.015365	0.078251	1
359.275	95	1	20	359.214	0.060518	0.078241	1
359.278	97	12	12	359.142	0.136375	0.078274	1
359.469	92	236	30	359.338	0.130603	0.078304	0
360.11	9	12	4	360.06	0.049407	0.078287	1
360.159	3	495	8	360.147	0.012178	0.07825	1
360.215	7	19	10	360.203	0.012118	0.078213	1
360.25	1	1	16	360.203	0.04688	0.078195	1
360.3	2	149	18	360.283	0.016164	0.07816	1
360.307	6	45	8	360	0.307277	0.078289	0
360.311	5	40	8	360.171	0.140321	0.078324	1
360.371	10	241	23	360.264	0.107812	0.078341	0
361.028	16	5	3	361.024	0.004225	0.078299	1
361.074	13	12	3	361.07	0.003686	0.078257	1
361.117	20	10	12	361.102	0.015215	0.078222	1
361.218	11	15	6	361.198	0.020274	0.078189	1
361.222	19	26	5	361.205	0.01648	0.078154	1
361.483	17	540	29	361.277	0.206608	0.078226	0
361.517	15	96	25	361.355	0.162178	0.078273	0
361.585	12	567	32	361.402	0.18376	0.078332	0
361.629	14	526	27	361.436	0.192694	0.078396	0
362.027	29	193	3	362.019	0.007907	0.078357	1
362.177	30	15	9	362.155	0.022471	0.078326	1
362.234	21	14	6	362.202	0.031957	0.0783	1
362.294	23	37	10	362.054	0.239493	0.07839	1
362.301	28	6	10	362.268	0.032943	0.078365	1
362.451	25	412	30	362.327	0.123352	0.07839	0
363.047	35	2	5	363.019	0.027331	0.078361	1
363.1	40	5	6	363.096	0.003925	0.07832	1
363.113	38	58	4	363.109	0.003806	0.078278	1
363.157	37	350	8	363.07	0.087246	0.078283	1
363.211	39	12	9	363.173	0.037746	0.078261	1
363.229	32	135	13	363.196	0.033057	0.078236	1
363.303	31	42	5	363.2	0.102998	0.078249	1
363.307	33	291	23	363.267	0.039901	0.078228	1
363.439	34	8	21	363.416	0.022765	0.078197	1
364.019	49	13	3	364.006	0.012721	0.078161	1
364.023	48	13	2	364.011	0.012124	0.078124	1
364.035	44	7	6	364.027	0.007552	0.078085	1
364.08	46	17	6	364.064	0.01601	0.078051	1
364.082	50	512	3	364.074	0.007831	0.078012	1
364.198	43	457	17	364.152	0.04504	0.077994	1
364.349	42	810	26	364.201	0.148087	0.078033	0
364.369	47	453	10	364.356	0.012844	0.077996	1
364.385	45	75	21	364.357	0.027542	0.077969	1
365.078	58	1	3	365.063	0.015715	0.077934	1
365.173	51	16	3	365.173	0	0.077891	1
365.265	55	2	19	365.233	0.03205	0.077866	1
365.327	52	31	10	365.229	0.0977	0.077877	1
365.343	56	80	11	365.233	0.109759	0.077894	1
365.367	53	146	19	365.303	0.064191	0.077887	1
365.383	54	587	15	365.091	0.292403	0.078005	0
365.403	60	10	10	365.393	0.009992	0.077968	1
366.009	62	2	2	366.009	0	0.077925	1
366.151	70	50	2	366.015	0.135571	0.077956	1
366.17	64	15	6	366.162	0.007531	0.077918	1
366.237	66	11	7	366.213	0.024595	0.077888	1
366.289	61	135	10	366.256	0.033114	0.077864	1
366.31	65	10	12	366.295	0.014574	0.077829	1
366.366	68	1	20	366.284	0.081604	0.077831	1
366.489	69	654	27	366.322	0.167093	0.07788	0
366.51	63	679	26	366.337	0.172814	0.077932	0
367.008	77	7	2	367.003	0.004105	0.077892	1
367.053	75	427	3	367.031	0.021335	0.077861	1
367.24	76	30	15	367.22	0.019911	0.077829	1
367.336	80	11	10	367.297	0.038375	0.077808	1
367.343	73	7	13	367.273	0.070396	0.077804	1
367.402	74	285	25	367.263	0.139603	0.077837	0
367.421	78	557	27	367.301	0.119584	0.07786	0
367.458	71	434	28	367.259	0.198926	0.077926	0
368.12	83	98	9	368.096	0.024212	0.077897	1
368.129	87	194	5	368.016	0.112759	0.077916	1
368.164	85	80	5	368.152	0.011725	0.07788	1
368.358	89	22	13	368.327	0.030799	0.077854	1
368.443	84	11	13	368.42	0.023073	0.077824	1
368.498	88	18	6	368.262	0.235888	0.07791	1
368.544	82	446	26	368.524	0.019789	0.077879	1
368.562	86	95	8	368.393	0.168345	0.077928	1
368.57	81	283	28	368.452	0.11866	0.07795	0
369.208	94	13	8	369.16	0.048018	0.077934	1
369.263	96	8	22	369.179	0.08387	0.077937	1
369.287	97	12	14	369.262	0.025431	0.077908	1
369.304	98	104	13	369.167	0.136961	0.07794	1
369.335	99	116	7	369.273	0.062302	0.077932	1
369.363	100	67	13	369.267	0.096249	0.077942	1
369.379	93	16	12	369.295	0.083952	0.077945	1
369.4	92	18	14	369.208	0.191632	0.078006	1
370	2	7	0	0	0.00025	0.078006	1	1
370	6	19	0	0	0.00025	0.078006	1	1
370.012	1	3	2	370.009	0.003706	0.077966	1
370.065	7	17	8	370.032	0.033157	0.077942	1
370.094	4	540	8	370.082	0.011877	0.077907	1
370.214	5	36	18	370.206	0.007932	0.077869	1
370.332	10	1	21	370.255	0.07756	0.077869	1
370.347	8	929	11	370.282	0.064584	0.077862	1
370.358	3	1	18	370.277	0.081872	0.077864	1
370.477	9	323	31	370.317	0.160044	0.077908	0
371.021	13	12	3	371.017	0.003806	0.077868	1
371.09	11	85	7	371.067	0.022728	0.077838	1
371.14	17	54	11	371.114	0.02633	0.077811	1
371.213	16	101	15	371.195	0.017304	0.077778	1
371.322	19	222	14	371.31	0.011879	0.077743	1
371.342	20	49	14	371.33	0.011678	0.077708	1
371.429	15	173	22	371.41	0.019885	0.077677	1
371.47	18	24	20	371.458	0.011698	0.077641	1
371.496	12	46	17	371.384	0.111831	0.07766	1
371.55	14	129	26	371.43	0.120325	0.077683	0
372.057	29	206	6	372.035	0.022076	0.077653	1
372.111	21	20	6	372.1	0.011772	0.077618	1
372.242	22	19	6	372.235	0.007531	0.07758	1
372.296	28	30	9	372.267	0.028616	0.077554	1
372.3	24	89	3	372.277	0.02255	0.077525	1
372.315	23	405	15	372.285	0.030669	0.0775	1
372.359	30	29	23	372.331	0.02785	0.077473	1
372.363	26	1	22	372.238	0.125868	0.077499	1
372.376	27	12	13	372.25	0.126206	0.077525	1
372.415	25	15	9	372.408	0.007432	0.077488	1
373.049	38	13	3	373.042	0.00765	0.077451	1
373.054	35	92	4	373.022	0.031858	0.077426	1
373.109	37	47	2	373.109	0	0.077385	1
373.136	40	6	6	373.132	0.003986	0.077346	1
373.175	36	37	8	373.128	0.046443	0.07733	1
373.183	31	652	10	373.149	0.033274	0.077307	1
373.236	39	235	8	373.034	0.201774	0.077373	1
373.288	32	35	11	373.277	0.011679	0.077338	1
373.336	33	390	24	373.192	0.144182	0.077373	0
374.092	43	2	5	374.084	0.007811	0.077336	1
374.158	45	3	6	374.146	0.011578	0.077302	1
374.239	49	161	6	374.114	0.125533	0.077327	1
374.267	50	3	18	374.203	0.064185	0.07732	1
374.438	44	73	18	374.421	0.017749	0.077289	1
374.483	47	122	28	374.346	0.136286	0.07732	0
375.039	53	23	3	375.007	0.031387	0.077296	1
375.078	57	1	3	375.029	0.049727	0.077281	1
375.184	55	4	9	375.176	0.007573	0.077244	1
375.267	58	7	14	375.221	0.04526	0.077228	1
375.275	51	146	19	375.199	0.075056	0.077226	1
375.362	56	232	19	375.345	0.017359	0.077195	1
375.45	60	56	13	375.442	0.007912	0.077159	1
375.564	59	38	22	375.437	0.126988	0.077185	1
375.614	52	183	30	375.403	0.210923	0.077255	0
375.635	54	796	30	375.5	0.1354	0.077285	0
376.067	62	24	7	376.038	0.029061	0.07726	1
376.254	64	13	2	376.103	0.150819	0.077299	1
376.338	66	771	22	376.33	0.008012	0.077262	1
376.389	61	42	8	376.384	0.004185	0.077224	1
376.444	70	28	10	376.421	0.02365	0.077196	1
376.452	67	47	10	376.429	0.022941	0.077168	1
376.522	69	34	22	376.51	0.012014	0.077134	1
376.568	68	370	21	376.547	0.020838	0.077104	1
376.618	63	542	24	376.464	0.153432	0.077144	0
377.045	79	268	3	377.028	0.01668	0.077113	1
377.186	75	401	5	377.056	0.130241	0.07714	0
377.266	76	7	13	377.209	0.056403	0.07713	1
377.31	73	7	13	377.286	0.02408	0.077102	1
377.324	80	11	7	377.248	0.076394	0.077101	1
377.498	77	24	23	377.478	0.019356	0.077071	1
377.526	72	461	28	377.384	0.141937	0.077105	0
377.561	71	26	22	377.392	0.168317	0.077153	1
377.649	78	211	26	377.526	0.123574	0.077177	0
378.059	82	303	7	378.03	0.029096	0.077152	1
378.112	88	5	5	378.1	0.011939	0.077118	1
378.154	87	14	8	378.085	0.069085	0.077114	1
378.344	84	178	12	378.329	0.015284	0.077082	1
378.418	81	399	24	378.266	0.152088	0.077121	0
378.473	86	15	9	378.465	0.007612	0.077085	1
378.534	89	708	28	378.402	0.132066	0.077113	0
378.542	83	66	18	378.505	0.037277	0.077092	1
378.624	90	57	22	378.608	0.015943	0.077061	1
379.038	96	40	3	379.007	0.030376	0.077037	1
379.107	95	15	5	379.049	0.057737	0.077027	1
379.116	98	8	4	379.088	0.028041	0.077001	1
379.208	92	18	11	379.177	0.030746	0.076977	1
379.214	91	2	22	379.167	0.047241	0.076962	1
379.23	100	312	15	379.168	0.062403	0.076955	1
379.372	94	491	13	379.092	0.28066	0.07706	0
379.421	99	696	30	379.298	0.122834	0.077083	0
380.098	2	5	4	380.086	0.01181	0.07705	1
380.119	10	131	8	380.035	0.084292	0.077053	1
380.177	9	11	5	380.177	0	0.077014	1
380.274	6	20	8	380	0.273745	0.077115	0
380.36	5	42	14	380.34	0.019906	0.077085	1
380.375	3	5	14	380.25	0.125391	0.07711	1
380.395	1	2	19	380.294	0.100259	0.077122	1
380.411	8	371	18	380.407	0.003706	0.077084	1
380.424	7	3	20	380.416	0.008171	0.077049	1
381.043	13	64	3	381.036	0.007472	0.077013	1
381.075	19	13	2	381.025	0.049773	0.076999	1
381.176	16	55	13	381.153	0.022655	0.076972	1
381.184	20	460	6	381.056	0.127364	0.076997	1
381.229	15	25	5	381.225	0.004045	0.07696	1
381.36	14	137	20	381.34	0.019089	0.076931	1
381.477	11	233	27	381.357	0.119484	0.076952	0
381.513	17	83	32	381.294	0.219441	0.077025	0
382.047	29	31	5	382.042	0.004499	0.076988	1
382.099	22	12	4	382.095	0.003746	0.076951	1
382.142	24	12	3	382.122	0.020141	0.076922	1
382.172	21	14	4	382.168	0.003946	0.076885	1
382.324	30	36	22	382.309	0.015144	0.076853	1
382.407	26	2	22	382.321	0.085816	0.076858	1
382.432	27	374	24	382.252	0.180549	0.07691	0
382.493	25	467	29	382.368	0.124773	0.076935	0
383.172	33	107	6	383.168	0.003665	0.076897	1
383.223	39	129	10	383.219	0.004145	0.076861	1
383.367	38	22	17	383.363	0.004026	0.076824	1
383.39	32	400	31	383.221	0.169334	0.07687	0
383.474	37	141	23	383.448	0.02522	0.076844	1
383.478	36	49	7	383.331	0.147135	0.07688	1
383.634	31	89	14	383.615	0.019344	0.076851	1
383.645	40	633	22	383.527	0.117731	0.076871	0
383.71	35	596	32	383.553	0.156701	0.076912	0
384.031	43	1	3	384.027	0.003865	0.076875	1
384.095	44	6	5	384.088	0.007126	0.07684	1
384.193	41	22	18	384.177	0.015658	0.076809	1
384.249	42	17	13	384.17	0.079331	0.07681	1
384.269	45	172	16	384.258	0.011818	0.076777	1
384.292	48	25	5	384.28	0.011857	0.076744	1
384.312	46	131	16	384.153	0.158731	0.076786	1
384.355	50	9	16	384.174	0.181292	0.076838	1
384.36	49	109	13	384.342	0.017578	0.076809	1
385.015	53	12	2	385.005	0.009658	0.076775	1
385.183	56	31	11	385.165	0.017604	0.076745	1
385.244	60	11	13	385.125	0.119189	0.076766	1
[truncated: 989 more rows]
